# Supplementary material
Source: publisher site journal article supplement (https://www.dovepress.com/article/146479)
Supplement: Supplementary file 1 [file get_supplementary_file.php]

Table S1. List of differentially expressed miRNAs.

| microRNA       | log2FoldChange | PValue   | change       |
|----------------|----------------|----------|--------------|
| hsa-mir-520c   | 9.313815227    | 2.24E-06 | up-regulated |
| hsa-mir-519a-1 | 9.215381125    | 1.53E-09 | up-regulated |
| hsa-mir-518f   | 8.863044453    | 1.70E-06 | up-regulated |
| hsa-mir-520b   | 8.684385888    | 8.15E-08 | up-regulated |
| hsa-mir-518c   | 8.340507321    | 9.94E-07 | up-regulated |
| hsa-mir-520f   | 8.312747319    | 5.81E-06 | up-regulated |
| hsa-mir-519b   | 8.238389322    | 3.07E-05 | up-regulated |
| hsa-mir-520g   | 8.212300487    | 9.84E-06 | up-regulated |
| hsa-mir-516a-2 | 8.178984776    | 8.25E-09 | up-regulated |
| hsa-mir-520a   | 8.151020733    | 8.89E-07 | up-regulated |
| hsa-mir-520d   | 8.119084101    | 8.21E-06 | up-regulated |
| hsa-mir-1323   | 7.982027463    | 4.69E-06 | up-regulated |
| hsa-mir-512-1  | 7.971795976    | 3.17E-07 | up-regulated |
| hsa-mir-518a-2 | 7.913718542    | 5.96E-06 | up-regulated |
| hsa-mir-525    | 7.790364895    | 3.62E-06 | up-regulated |
| hsa-mir-518b   | 7.784577912    | 1.11E-06 | up-regulated |
| hsa-mir-512-2  | 7.782736437    | 3.66E-07 | up-regulated |
| hsa-mir-526b   | 7.760531056    | 3.09E-07 | up-regulated |
| hsa-mir-517c   | 7.689109885    | 5.46E-05 | up-regulated |
| hsa-mir-518a-1 | 7.607642457    | 1.56E-05 | up-regulated |
| hsa-mir-524    | 7.594467278    | 1.94E-05 | up-regulated |
| hsa-mir-527    | 7.571942759    | 7.49E-06 | up-regulated |
| hsa-mir-516b-1 | 7.522216786    | 2.15E-05 | up-regulated |
| hsa-mir-1283-2 | 7.459349894    | 3.69E-06 | up-regulated |
| hsa-mir-520h   | 7.432382552    | 5.00E-05 | up-regulated |
| hsa-mir-519a-2 | 7.388575872    | 4.66E-07 | up-regulated |
| hsa-mir-519d   | 7.378886055    | 5.70E-05 | up-regulated |
| hsa-mir-521-1  | 7.334819143    | 2.52E-05 | up-regulated |
| hsa-mir-519c   | 7.333108062    | 2.93E-05 | up-regulated |
| hsa-mir-523    | 7.331294789    | 9.79E-05 | up-regulated |
| hsa-mir-515-2  | 7.181549851    | 4.40E-05 | up-regulated |
| hsa-mir-517a   | 7.126842712    | 1.34E-05 | up-regulated |
| hsa-mir-517b   | 7.11118346     | 1.40E-05 | up-regulated |
| hsa-mir-515-1  | 6.963544296    | 2.21E-05 | up-regulated |
| hsa-mir-522    | 6.942489706    | 3.68E-06 | up-regulated |
| hsa-mir-518e   | 6.867412304    | 2.75E-05 | up-regulated |
| hsa-mir-516a-1 | 6.807056285    | 5.64E-07 | up-regulated |
| hsa-mir-498    | 6.603113739    | 6.22E-05 | up-regulated |
| hsa-mir-519e   | 6.432251706    | 0.000161 | up-regulated |
| hsa-mir-520e   | 6.22495718     | 0.000232 | up-regulated |
| hsa-mir-516b-2 | 6.005907962    | 0.000185 | up-regulated |

|                |             |          |              |
|----------------|-------------|----------|--------------|
| hsa-mir-1283-1 | 5.92035594  | 3.07E-05 | up-regulated |
| hsa-mir-372    | 5.869644584 | 9.07E-05 | up-regulated |
| hsa-mir-521-2  | 5.314326192 | 0.000112 | up-regulated |
| hsa-mir-210    | 4.91165479  | 7.47E-19 | up-regulated |
| hsa-mir-373    | 4.866223868 | 0.003119 | up-regulated |
| hsa-mir-371a   | 4.779955698 | 0.007649 | up-regulated |
| hsa-mir-767    | 4.700364459 | 6.96E-06 | up-regulated |
| hsa-mir-3131   | 4.624952667 | 0.000724 | up-regulated |
| hsa-mir-6715b  | 4.390379548 | 0.000121 | up-regulated |
| hsa-mir-483    | 4.288144013 | 8.29E-06 | up-regulated |
| hsa-mir-147b   | 4.280101459 | 1.78E-09 | up-regulated |
| hsa-mir-215    | 4.23624252  | 7.85E-06 | up-regulated |
| hsa-mir-105-1  | 4.134315873 | 4.79E-05 | up-regulated |
| hsa-mir-518d   | 4.028342284 | 0.011494 | up-regulated |
| hsa-mir-105-2  | 4.023104349 | 5.02E-05 | up-regulated |
| hsa-mir-301b   | 3.955217591 | 3.09E-13 | up-regulated |
| hsa-mir-548y   | 3.805389577 | 0.000617 | up-regulated |
| hsa-mir-4523   | 3.792140758 | 5.77E-06 | up-regulated |
| hsa-mir-96     | 3.747287447 | 1.71E-18 | up-regulated |
| hsa-mir-526a-2 | 3.65548077  | 0.021039 | up-regulated |
| hsa-mir-577    | 3.655434495 | 0.000167 | up-regulated |
| hsa-mir-135b   | 3.611007752 | 1.59E-09 | up-regulated |
| hsa-mir-1251   | 3.554160591 | 0.002142 | up-regulated |
| hsa-mir-7112   | 3.514325192 | 1.63E-05 | up-regulated |
| hsa-mir-4724   | 3.513996519 | 2.08E-08 | up-regulated |
| hsa-mir-7705   | 3.406631096 | 4.99E-13 | up-regulated |
| hsa-mir-4756   | 3.32222468  | 0.00087  | up-regulated |
| hsa-mir-514b   | 3.311079598 | 0.018691 | up-regulated |
| hsa-mir-1293   | 3.291439254 | 0.000103 | up-regulated |
| hsa-mir-4446   | 3.283892048 | 1.27E-05 | up-regulated |
| hsa-mir-615    | 3.263086992 | 1.37E-05 | up-regulated |
| hsa-mir-526a-1 | 3.200383016 | 0.019376 | up-regulated |
| hsa-mir-211    | 3.191595393 | 0.01196  | up-regulated |
| hsa-mir-18a    | 3.182326474 | 1.25E-17 | up-regulated |
| hsa-mir-3944   | 2.997309045 | 1.12E-06 | up-regulated |
| hsa-mir-183    | 2.978545656 | 5.82E-14 | up-regulated |
| hsa-mir-7974   | 2.96886678  | 1.64E-05 | up-regulated |
| hsa-mir-934    | 2.956132917 | 2.36E-06 | up-regulated |
| hsa-mir-3660   | 2.947578296 | 0.002572 | up-regulated |
| hsa-mir-6728   | 2.944089572 | 0.000235 | up-regulated |
| hsa-mir-548x   | 2.929911573 | 0.008824 | up-regulated |
| hsa-mir-675    | 2.886585186 | 0.000131 | up-regulated |
| hsa-mir-4664   | 2.878218312 | 6.97E-08 | up-regulated |
| hsa-mir-1910   | 2.857938988 | 1.45E-06 | up-regulated |

|                |             |          |              |
|----------------|-------------|----------|--------------|
| hsa-mir-3189   | 2.84212627  | 0.000324 | up-regulated |
| hsa-mir-345    | 2.816657339 | 2.78E-12 | up-regulated |
| hsa-mir-203b   | 2.80122493  | 0.000289 | up-regulated |
| hsa-mir-5092   | 2.771726706 | 6.41E-05 | up-regulated |
| hsa-mir-4652   | 2.769129675 | 1.60E-05 | up-regulated |
| hsa-mir-573    | 2.75602433  | 0.00105  | up-regulated |
| hsa-mir-4763   | 2.745639555 | 0.000796 | up-regulated |
| hsa-mir-33b    | 2.735975944 | 5.67E-09 | up-regulated |
| hsa-mir-429    | 2.727128541 | 1.12E-09 | up-regulated |
| hsa-mir-31     | 2.717431868 | 9.67E-06 | up-regulated |
| hsa-mir-6783   | 2.71246915  | 2.10E-07 | up-regulated |
| hsa-mir-138-1  | 2.706289273 | 3.71E-05 | up-regulated |
| hsa-mir-6814   | 2.701886475 | 8.72E-05 | up-regulated |
| hsa-mir-1305   | 2.699858489 | 0.004293 | up-regulated |
| hsa-mir-4665   | 2.679796052 | 0.00023  | up-regulated |
| hsa-mir-6754   | 2.654806857 | 0.001907 | up-regulated |
| hsa-mir-224    | 2.645439814 | 1.24E-06 | up-regulated |
| hsa-mir-489    | 2.62532597  | 0.000308 | up-regulated |
| hsa-mir-141    | 2.611321846 | 4.09E-12 | up-regulated |
| hsa-mir-335    | 2.588727982 | 1.03E-07 | up-regulated |
| hsa-mir-3651   | 2.577590995 | 1.27E-06 | up-regulated |
| hsa-mir-3200   | 2.572132234 | 6.40E-07 | up-regulated |
| hsa-mir-6844   | 2.552016951 | 0.000542 | up-regulated |
| hsa-mir-548f-1 | 2.533150084 | 0.009243 | up-regulated |
| hsa-mir-4449   | 2.528384194 | 3.38E-05 | up-regulated |
| hsa-mir-192    | 2.52710855  | 1.56E-07 | up-regulated |
| hsa-mir-4501   | 2.488713967 | 0.012952 | up-regulated |
| hsa-mir-509-1  | 2.430498894 | 0.005206 | up-regulated |
| hsa-mir-509-2  | 2.427391239 | 0.004018 | up-regulated |
| hsa-mir-449b   | 2.42615453  | 0.008802 | up-regulated |
| hsa-mir-138-2  | 2.416242401 | 0.000109 | up-regulated |
| hsa-mir-940    | 2.404070694 | 2.26E-10 | up-regulated |
| hsa-mir-33a    | 2.404020322 | 1.26E-12 | up-regulated |
| hsa-mir-4758   | 2.393602765 | 3.37E-05 | up-regulated |
| hsa-mir-1229   | 2.361930288 | 1.69E-06 | up-regulated |
| hsa-mir-503    | 2.352333707 | 1.57E-10 | up-regulated |
| hsa-mir-612    | 2.346307959 | 0.020924 | up-regulated |
| hsa-mir-1915   | 2.344033818 | 0.002417 | up-regulated |
| hsa-mir-137    | 2.331996347 | 0.01297  | up-regulated |
| hsa-mir-130b   | 2.322520751 | 7.62E-15 | up-regulated |
| hsa-mir-6777   | 2.308593976 | 0.002085 | up-regulated |
| hsa-mir-551b   | 2.308541174 | 0.000517 | up-regulated |
| hsa-mir-559    | 2.304557871 | 0.003219 | up-regulated |
| hsa-mir-182    | 2.30409049  | 1.53E-10 | up-regulated |

|                |             |          |              |
|----------------|-------------|----------|--------------|
| hsa-mir-449a   | 2.290866258 | 0.001329 | up-regulated |
| hsa-mir-3178   | 2.277143176 | 0.003279 | up-regulated |
| hsa-mir-3654   | 2.251311072 | 0.00245  | up-regulated |
| hsa-mir-3664   | 2.226066534 | 0.000627 | up-regulated |
| hsa-mir-216a   | 2.224664645 | 0.019868 | up-regulated |
| hsa-mir-877    | 2.222266526 | 5.97E-11 | up-regulated |
| hsa-mir-6870   | 2.217680125 | 0.003246 | up-regulated |
| hsa-mir-509-3  | 2.215120587 | 0.01015  | up-regulated |
| hsa-mir-6742   | 2.214712211 | 0.001034 | up-regulated |
| hsa-mir-205    | 2.210048119 | 2.01E-06 | up-regulated |
| hsa-mir-3144   | 2.208954404 | 0.000536 | up-regulated |
| hsa-mir-200a   | 2.193711636 | 6.37E-08 | up-regulated |
| hsa-mir-4636   | 2.18507862  | 0.000275 | up-regulated |
| hsa-mir-3136   | 2.180561074 | 4.97E-05 | up-regulated |
| hsa-mir-301a   | 2.17930984  | 5.53E-12 | up-regulated |
| hsa-mir-4687   | 2.15968378  | 0.000191 | up-regulated |
| hsa-mir-217    | 2.132097404 | 0.004784 | up-regulated |
| hsa-mir-937    | 2.130824995 | 9.27E-08 | up-regulated |
| hsa-mir-6499   | 2.128829999 | 0.002538 | up-regulated |
| hsa-mir-1908   | 2.123776432 | 0.006157 | up-regulated |
| hsa-mir-5579   | 2.12148039  | 0.003679 | up-regulated |
| hsa-mir-466    | 2.118137918 | 0.00565  | up-regulated |
| hsa-mir-3911   | 2.097216984 | 0.007727 | up-regulated |
| hsa-mir-1277   | 2.096067426 | 1.08E-08 | up-regulated |
| hsa-mir-3176   | 2.086425125 | 0.00144  | up-regulated |
| hsa-mir-3618   | 2.077903668 | 0.001285 | up-regulated |
| hsa-mir-19a    | 2.074955521 | 2.18E-14 | up-regulated |
| hsa-mir-6850   | 2.05858353  | 0.009331 | up-regulated |
| hsa-mir-548d-1 | 2.047282872 | 0.001309 | up-regulated |
| hsa-mir-3198-2 | 2.033709366 | 0.007627 | up-regulated |
| hsa-mir-2278   | 2.017245344 | 0.005578 | up-regulated |
| hsa-mir-579    | 2.015876198 | 2.97E-05 | up-regulated |
| hsa-mir-4638   | 2.014635903 | 3.12E-06 | up-regulated |
| hsa-mir-708    | 2.010143364 | 4.69E-08 | up-regulated |
| hsa-mir-4745   | 1.983972005 | 0.01435  | up-regulated |
| hsa-mir-584    | 1.97670637  | 4.67E-07 | up-regulated |
| hsa-mir-20a    | 1.964123877 | 1.02E-12 | up-regulated |
| hsa-mir-556    | 1.956434152 | 0.000251 | up-regulated |
| hsa-mir-1270   | 1.947395502 | 0.000124 | up-regulated |
| hsa-mir-34b    | 1.94022052  | 2.60E-05 | up-regulated |
| hsa-mir-3939   | 1.931058309 | 0.008817 | up-regulated |
| hsa-mir-3170   | 1.923349459 | 3.47E-06 | up-regulated |
| hsa-mir-6797   | 1.906277887 | 0.003995 | up-regulated |
| hsa-mir-425    | 1.906099522 | 1.15E-12 | up-regulated |

|                |             |          |              |
|----------------|-------------|----------|--------------|
| hsa-mir-149    | 1.903668944 | 5.05E-07 | up-regulated |
| hsa-mir-93     | 1.882795942 | 1.64E-13 | up-regulated |
| hsa-mir-455    | 1.882170493 | 1.48E-08 | up-regulated |
| hsa-mir-3192   | 1.86927092  | 0.012775 | up-regulated |
| hsa-mir-2277   | 1.86816029  | 4.99E-06 | up-regulated |
| hsa-mir-4713   | 1.867303826 | 0.000375 | up-regulated |
| hsa-mir-3117   | 1.860222683 | 0.000299 | up-regulated |
| hsa-mir-944    | 1.85946825  | 0.000215 | up-regulated |
| hsa-mir-6769a  | 1.858317974 | 0.013622 | up-regulated |
| hsa-mir-570    | 1.857745792 | 1.54E-05 | up-regulated |
| hsa-mir-4640   | 1.857642985 | 0.000361 | up-regulated |
| hsa-mir-4766   | 1.854375124 | 0.001811 | up-regulated |
| hsa-mir-6786   | 1.847112817 | 0.017678 | up-regulated |
| hsa-mir-935    | 1.836749959 | 0.015968 | up-regulated |
| hsa-mir-6793   | 1.833994557 | 0.000138 | up-regulated |
| hsa-mir-1254-1 | 1.820472385 | 3.38E-05 | up-regulated |
| hsa-mir-4479   | 1.818812016 | 0.009797 | up-regulated |
| hsa-mir-6858   | 1.813802382 | 0.007067 | up-regulated |
| hsa-mir-3616   | 1.81151755  | 0.016558 | up-regulated |
| hsa-mir-3619   | 1.805496007 | 0.001279 | up-regulated |
| hsa-mir-200b   | 1.804599195 | 5.76E-06 | up-regulated |
| hsa-mir-17     | 1.799409016 | 1.05E-14 | up-regulated |
| hsa-mir-3194   | 1.796045502 | 0.000618 | up-regulated |
| hsa-mir-6781   | 1.791879355 | 0.000495 | up-regulated |
| hsa-mir-6787   | 1.781747221 | 0.02054  | up-regulated |
| hsa-mir-671    | 1.778996922 | 5.74E-17 | up-regulated |
| hsa-mir-3943   | 1.77675693  | 0.016923 | up-regulated |
| hsa-mir-549a   | 1.77096813  | 0.007082 | up-regulated |
| hsa-mir-3065   | 1.768963403 | 2.99E-05 | up-regulated |
| hsa-mir-1914   | 1.763051463 | 0.004549 | up-regulated |
| hsa-mir-20b    | 1.744497598 | 0.000411 | up-regulated |
| hsa-mir-1291   | 1.739918149 | 4.59E-05 | up-regulated |
| hsa-mir-597    | 1.736707834 | 0.012875 | up-regulated |
| hsa-mir-6736   | 1.733607831 | 0.009435 | up-regulated |
| hsa-mir-194-2  | 1.714626745 | 0.000179 | up-regulated |
| hsa-mir-1227   | 1.710842266 | 0.009714 | up-regulated |
| hsa-mir-4802   | 1.700849157 | 0.000624 | up-regulated |
| hsa-mir-4778   | 1.696195059 | 0.019976 | up-regulated |
| hsa-mir-323b   | 1.688127998 | 0.000258 | up-regulated |
| hsa-mir-641    | 1.68733514  | 0.004907 | up-regulated |
| hsa-mir-4787   | 1.686034402 | 0.003603 | up-regulated |
| hsa-mir-1307   | 1.681137622 | 5.95E-14 | up-regulated |
| hsa-mir-508    | 1.671576302 | 0.020388 | up-regulated |
| hsa-mir-8072   | 1.668033799 | 0.002578 | up-regulated |

|                |             |          |              |
|----------------|-------------|----------|--------------|
| hsa-mir-636    | 1.666529645 | 0.00041  | up-regulated |
| hsa-mir-194-1  | 1.659845772 | 0.0003   | up-regulated |
| hsa-mir-590    | 1.654524308 | 5.61E-15 | up-regulated |
| hsa-mir-6868   | 1.637882202 | 0.003448 | up-regulated |
| hsa-mir-642a   | 1.633107272 | 9.19E-05 | up-regulated |
| hsa-mir-6885   | 1.630161447 | 0.008958 | up-regulated |
| hsa-mir-5582   | 1.620968609 | 0.01253  | up-regulated |
| hsa-mir-6773   | 1.618243721 | 0.012221 | up-regulated |
| hsa-mir-34c    | 1.614964573 | 8.49E-05 | up-regulated |
| hsa-mir-3143   | 1.613887667 | 0.004098 | up-regulated |
| hsa-mir-1276   | 1.60485286  | 0.011144 | up-regulated |
| hsa-mir-4746   | 1.603769838 | 1.26E-06 | up-regulated |
| hsa-mir-3614   | 1.602339826 | 0.000176 | up-regulated |
| hsa-mir-616    | 1.589765535 | 6.04E-06 | up-regulated |
| hsa-mir-1304   | 1.585767843 | 0.000967 | up-regulated |
| hsa-mir-3913-2 | 1.585343564 | 6.29E-05 | up-regulated |
| hsa-mir-18b    | 1.578851437 | 0.001369 | up-regulated |
| hsa-mir-3074   | 1.568719875 | 0.000106 | up-regulated |
| hsa-mir-651    | 1.562638873 | 8.64E-09 | up-regulated |
| hsa-mir-21     | 1.557020165 | 1.07E-11 | up-regulated |
| hsa-mir-200c   | 1.553543542 | 7.12E-06 | up-regulated |
| hsa-mir-106a   | 1.536149472 | 9.80E-06 | up-regulated |
| hsa-mir-188    | 1.534220505 | 6.51E-07 | up-regulated |
| hsa-mir-3934   | 1.52996066  | 2.66E-06 | up-regulated |
| hsa-mir-7-2    | 1.529227442 | 0.002753 | up-regulated |
| hsa-mir-4707   | 1.523662312 | 0.002676 | up-regulated |
| hsa-mir-4728   | 1.523633702 | 0.002815 | up-regulated |
| hsa-mir-1301   | 1.519645612 | 1.07E-08 | up-regulated |
| hsa-mir-548o-2 | 1.51456786  | 0.000445 | up-regulated |
| hsa-mir-939    | 1.497446736 | 9.11E-06 | up-regulated |
| hsa-mir-3662   | 1.49600179  | 0.003046 | up-regulated |
| hsa-mir-4777   | 1.489751527 | 0.002266 | up-regulated |
| hsa-mir-4754   | 1.475481714 | 0.012239 | up-regulated |
| hsa-mir-653    | 1.47075559  | 0.000536 | up-regulated |
| hsa-mir-551a   | 1.470510019 | 0.013511 | up-regulated |
| hsa-mir-545    | 1.445821742 | 0.000746 | up-regulated |
| hsa-mir-3913-1 | 1.426423142 | 0.000173 | up-regulated |
| hsa-mir-3613   | 1.42534338  | 2.74E-10 | up-regulated |
| hsa-mir-324    | 1.412506714 | 1.06E-08 | up-regulated |
| hsa-mir-196a-1 | 1.410734256 | 0.008192 | up-regulated |
| hsa-mir-548au  | 1.409382653 | 0.002026 | up-regulated |
| hsa-mir-6820   | 1.386072449 | 0.001133 | up-regulated |
| hsa-mir-1254-2 | 1.38516185  | 0.0054   | up-regulated |
| hsa-mir-6894   | 1.385023986 | 0.013672 | up-regulated |

|                |             |          |              |
|----------------|-------------|----------|--------------|
| hsa-mir-548o   | 1.38422432  | 0.001082 | up-regulated |
| hsa-mir-3174   | 1.361470844 | 0.009525 | up-regulated |
| hsa-mir-3922   | 1.354030687 | 0.001377 | up-regulated |
| hsa-mir-548k   | 1.350237152 | 0.018989 | up-regulated |
| hsa-mir-339    | 1.346473417 | 4.06E-06 | up-regulated |
| hsa-mir-4797   | 1.346115997 | 0.008436 | up-regulated |
| hsa-mir-3691   | 1.33959     | 0.020332 | up-regulated |
| hsa-mir-7854   | 1.330316574 | 0.000208 | up-regulated |
| hsa-mir-643    | 1.327589765 | 2.22E-05 | up-regulated |
| hsa-mir-6501   | 1.320338977 | 0.002343 | up-regulated |
| hsa-mir-454    | 1.320217394 | 2.47E-10 | up-regulated |
| hsa-mir-19b-1  | 1.31221461  | 4.17E-10 | up-regulated |
| hsa-mir-639    | 1.311305938 | 0.003426 | up-regulated |
| hsa-mir-19b-2  | 1.298991851 | 8.62E-10 | up-regulated |
| hsa-mir-181b-1 | 1.29672512  | 1.33E-07 | up-regulated |
| hsa-mir-193b   | 1.296543212 | 7.29E-06 | up-regulated |
| hsa-mir-1292   | 1.291489173 | 0.00086  | up-regulated |
| hsa-mir-550a-1 | 1.282779455 | 1.12E-05 | up-regulated |
| hsa-mir-5706   | 1.278322392 | 0.004459 | up-regulated |
| hsa-mir-187    | 1.271120341 | 0.017367 | up-regulated |
| hsa-mir-6854   | 1.267843349 | 2.05E-05 | up-regulated |
| hsa-mir-191    | 1.262419023 | 1.03E-07 | up-regulated |
| hsa-mir-181b-2 | 1.255483845 | 5.07E-07 | up-regulated |
| hsa-mir-142    | 1.242094754 | 0.000606 | up-regulated |
| hsa-mir-550a-2 | 1.241556561 | 3.12E-05 | up-regulated |
| hsa-mir-548s   | 1.238574917 | 0.014745 | up-regulated |
| hsa-mir-548j   | 1.197647265 | 0.000521 | up-regulated |
| hsa-mir-185    | 1.189806601 | 1.33E-10 | up-regulated |
| hsa-mir-3652   | 1.188398895 | 0.017158 | up-regulated |
| hsa-mir-7706   | 1.169382588 | 0.000931 | up-regulated |
| hsa-mir-4668   | 1.167613538 | 8.56E-05 | up-regulated |
| hsa-mir-4326   | 1.154319139 | 0.004978 | up-regulated |
| hsa-mir-942    | 1.147001915 | 4.64E-06 | up-regulated |
| hsa-mir-1226   | 1.133375397 | 0.002635 | up-regulated |
| hsa-mir-581    | 1.132876089 | 0.021085 | up-regulated |
| hsa-mir-450a-2 | 1.121742742 | 2.38E-05 | up-regulated |
| hsa-mir-32     | 1.11696375  | 2.83E-07 | up-regulated |
| hsa-mir-1284   | 1.11562768  | 0.006422 | up-regulated |
| hsa-mir-15a    | 1.107216226 | 2.44E-07 | up-regulated |
| hsa-mir-5684   | 1.103971364 | 0.01083  | up-regulated |
| hsa-mir-760    | 1.09753017  | 0.012246 | up-regulated |
| hsa-mir-627    | 1.085435614 | 2.33E-05 | up-regulated |
| hsa-mir-3928   | 1.085165008 | 0.000502 | up-regulated |
| hsa-mir-331    | 1.075245598 | 8.02E-07 | up-regulated |

|                |             |          |              |
|----------------|-------------|----------|--------------|
| hsa-mir-5699   | 1.074684482 | 0.014453 | up-regulated |
| hsa-mir-452    | 1.073706316 | 0.009549 | up-regulated |
| hsa-mir-4662a  | 1.070404517 | 0.001176 | up-regulated |
| hsa-mir-5001   | 1.057400538 | 0.000424 | up-regulated |
| hsa-mir-1180   | 1.046014354 | 0.0004   | up-regulated |
| hsa-mir-576    | 1.040019445 | 9.25E-07 | up-regulated |
| hsa-mir-652    | 1.029456841 | 1.67E-06 | up-regulated |
| hsa-mir-580    | 1.028718031 | 0.002837 | up-regulated |
| hsa-mir-1343   | 1.007093527 | 0.021007 | up-regulated |
| hsa-mir-3615   | 1.005401824 | 5.03E-06 | up-regulated |
| hsa-mir-5581   | 1.00291604  | 0.009646 | up-regulated |
| hsa-mir-219a-1 | 1.001016639 | 0.000216 | up-regulated |
| hsa-mir-4661   | 0.990096674 | 0.003076 | up-regulated |
| hsa-mir-548v   | 0.981214337 | 0.016728 | up-regulated |
| hsa-mir-106b   | 0.976522754 | 7.16E-08 | up-regulated |
| hsa-mir-629    | 0.965824364 | 6.69E-06 | up-regulated |
| hsa-mir-181a-1 | 0.952493359 | 4.53E-06 | up-regulated |
| hsa-mir-92a-1  | 0.946302267 | 2.29E-07 | up-regulated |
| hsa-mir-181c   | 0.945301954 | 0.000616 | up-regulated |
| hsa-mir-181a-2 | 0.930237207 | 1.66E-05 | up-regulated |
| hsa-mir-3607   | 0.929957293 | 0.002241 | up-regulated |
| hsa-mir-92a-2  | 0.92446059  | 3.07E-07 | up-regulated |
| hsa-mir-6516   | 0.904609302 | 0.010006 | up-regulated |
| hsa-mir-450a-1 | 0.90225362  | 0.000551 | up-regulated |
| hsa-mir-219b   | 0.901146097 | 0.010687 | up-regulated |
| hsa-mir-550a-3 | 0.876540999 | 0.002052 | up-regulated |
| hsa-mir-548e   | 0.873436338 | 0.00356  | up-regulated |
| hsa-mir-130a   | 0.862554769 | 0.001013 | up-regulated |
| hsa-mir-874    | 0.849034425 | 0.000524 | up-regulated |
| hsa-mir-3653   | 0.822276664 | 0.00997  | up-regulated |
| hsa-mir-769    | 0.820338999 | 1.68E-05 | up-regulated |
| hsa-mir-1306   | 0.813373304 | 0.001362 | up-regulated |
| hsa-mir-148b   | 0.805808562 | 4.99E-08 | up-regulated |
| hsa-mir-744    | 0.76798761  | 0.000841 | up-regulated |
| hsa-mir-196b   | 0.746926201 | 0.006235 | up-regulated |
| hsa-mir-7-1    | 0.736729421 | 0.001525 | up-regulated |
| hsa-mir-501    | 0.707990623 | 0.003384 | up-regulated |
| hsa-mir-484    | 0.697770346 | 0.000109 | up-regulated |
| hsa-mir-197    | 0.685931356 | 0.000766 | up-regulated |
| hsa-mir-589    | 0.675131288 | 0.000712 | up-regulated |
| hsa-mir-34a    | 0.664426076 | 0.002312 | up-regulated |
| hsa-mir-4677   | 0.64518839  | 0.001696 | up-regulated |
| hsa-mir-27a    | 0.633992179 | 0.004489 | up-regulated |
| hsa-mir-16-1   | 0.591857913 | 0.000402 | up-regulated |



|                |              |          |                |
|----------------|--------------|----------|----------------|
| hsa-mir-423    | 0.586307339  | 0.000183 | up-regulated   |
| hsa-mir-193a   | -0.610335617 | 0.004636 | down-regulated |
| hsa-mir-101-1  | -0.618002414 | 0.000437 | down-regulated |
| hsa-mir-134    | -0.619649003 | 0.021285 | down-regulated |
| hsa-mir-101-2  | -0.629235424 | 0.000331 | down-regulated |
| hsa-let-7i     | -0.64387419  | 6.33E-06 | down-regulated |
| hsa-mir-664b   | -0.645861497 | 0.001664 | down-regulated |
| hsa-mir-496    | -0.6752388   | 0.021492 | down-regulated |
| hsa-mir-374a   | -0.682869296 | 5.02E-06 | down-regulated |
| hsa-mir-376c   | -0.687562966 | 0.018224 | down-regulated |
| hsa-mir-320a   | -0.7068224   | 6.70E-05 | down-regulated |
| hsa-mir-30c-1  | -0.725823268 | 3.02E-05 | down-regulated |
| hsa-mir-369    | -0.732548923 | 0.008148 | down-regulated |
| hsa-mir-451a   | -0.734489818 | 0.020303 | down-regulated |
| hsa-mir-887    | -0.737052719 | 0.003904 | down-regulated |
| hsa-let-7f-2   | -0.788841913 | 2.74E-06 | down-regulated |
| hsa-mir-487a   | -0.79156768  | 0.009082 | down-regulated |
| hsa-mir-758    | -0.793981474 | 0.010168 | down-regulated |
| hsa-mir-212    | -0.79687302  | 0.001866 | down-regulated |
| hsa-let-7f-1   | -0.797141183 | 2.11E-06 | down-regulated |
| hsa-mir-4999   | -0.838603066 | 0.006018 | down-regulated |
| hsa-mir-370    | -0.846494043 | 0.001681 | down-regulated |
| hsa-mir-574    | -0.849607136 | 3.28E-08 | down-regulated |
| hsa-mir-487b   | -0.855550937 | 0.002154 | down-regulated |
| hsa-mir-30c-2  | -0.856773413 | 1.12E-07 | down-regulated |
| hsa-mir-582    | -0.888356431 | 0.000232 | down-regulated |
| hsa-mir-543    | -0.901900078 | 0.000585 | down-regulated |
| hsa-mir-432    | -0.909965245 | 0.003797 | down-regulated |
| hsa-mir-27b    | -0.934646511 | 4.04E-08 | down-regulated |
| hsa-mir-378d-1 | -0.94036427  | 0.010217 | down-regulated |
| hsa-mir-6716   | -0.954983496 | 6.20E-05 | down-regulated |
| hsa-mir-151b   | -0.956151712 | 9.89E-06 | down-regulated |
| hsa-mir-377    | -0.961025184 | 0.002366 | down-regulated |
| hsa-mir-329-2  | -0.964312961 | 0.006937 | down-regulated |
| hsa-mir-29c    | -0.968777212 | 0.000193 | down-regulated |
| hsa-mir-340    | -0.986857028 | 7.76E-09 | down-regulated |
| hsa-mir-486-1  | -0.996224181 | 0.001399 | down-regulated |
| hsa-mir-497    | -0.996996255 | 2.71E-06 | down-regulated |
| hsa-mir-6717   | -1.028754613 | 0.016514 | down-regulated |
| hsa-mir-486-2  | -1.036340986 | 0.000843 | down-regulated |
| hsa-let-7a-2   | -1.041376311 | 1.92E-09 | down-regulated |
| hsa-mir-381    | -1.052948074 | 1.12E-06 | down-regulated |
| hsa-mir-152    | -1.070219295 | 3.50E-07 | down-regulated |
| hsa-mir-6788   | -1.072726576 | 0.017305 | down-regulated |

|                |              |          |                |
|----------------|--------------|----------|----------------|
| hsa-mir-132    | -1.07321609  | 1.62E-09 | down-regulated |
| hsa-mir-140    | -1.078081307 | 2.92E-13 | down-regulated |
| hsa-mir-299    | -1.088849088 | 1.80E-05 | down-regulated |
| hsa-mir-150    | -1.090250739 | 0.000682 | down-regulated |
| hsa-mir-4424   | -1.111171712 | 0.007932 | down-regulated |
| hsa-mir-30e    | -1.127817461 | 1.79E-16 | down-regulated |
| hsa-mir-26a-2  | -1.164480687 | 8.39E-17 | down-regulated |
| hsa-mir-26a-1  | -1.166692138 | 1.05E-16 | down-regulated |
| hsa-mir-495    | -1.181595736 | 1.06E-06 | down-regulated |
| hsa-mir-127    | -1.216812389 | 3.33E-07 | down-regulated |
| hsa-mir-3926-2 | -1.219627278 | 0.000469 | down-regulated |
| hsa-mir-10b    | -1.239783893 | 9.32E-09 | down-regulated |
| hsa-mir-411    | -1.241843192 | 1.43E-06 | down-regulated |
| hsa-mir-6129   | -1.274670785 | 0.011992 | down-regulated |
| hsa-mir-29a    | -1.280117378 | 1.44E-09 | down-regulated |
| hsa-mir-548aw  | -1.283924383 | 9.18E-05 | down-regulated |
| hsa-mir-654    | -1.322371727 | 6.88E-06 | down-regulated |
| hsa-mir-378a   | -1.333314107 | 3.02E-09 | down-regulated |
| hsa-mir-5091   | -1.33804994  | 0.000265 | down-regulated |
| hsa-mir-3926-1 | -1.341131777 | 0.000118 | down-regulated |
| hsa-mir-1262   | -1.35058365  | 5.89E-07 | down-regulated |
| hsa-mir-337    | -1.351143875 | 2.46E-08 | down-regulated |
| hsa-mir-605    | -1.35803536  | 0.002389 | down-regulated |
| hsa-mir-3617   | -1.364192838 | 0.004104 | down-regulated |
| hsa-mir-365a   | -1.372263119 | 1.10E-13 | down-regulated |
| hsa-mir-365b   | -1.380705197 | 7.91E-14 | down-regulated |
| hsa-mir-379    | -1.401652987 | 1.59E-08 | down-regulated |
| hsa-mir-23b    | -1.411286802 | 8.73E-18 | down-regulated |
| hsa-mir-374b   | -1.415227996 | 8.25E-16 | down-regulated |
| hsa-mir-5089   | -1.416365397 | 0.008466 | down-regulated |
| hsa-mir-5698   | -1.441035609 | 3.86E-05 | down-regulated |
| hsa-mir-378c   | -1.464050154 | 1.53E-11 | down-regulated |
| hsa-mir-218-1  | -1.465031923 | 4.22E-10 | down-regulated |
| hsa-mir-218-2  | -1.471174495 | 4.09E-10 | down-regulated |
| hsa-mir-4732   | -1.492183157 | 0.000255 | down-regulated |
| hsa-mir-585    | -1.501298952 | 3.19E-06 | down-regulated |
| hsa-mir-6843   | -1.503993852 | 0.002202 | down-regulated |
| hsa-mir-4536-2 | -1.529557027 | 4.54E-05 | down-regulated |
| hsa-mir-7156   | -1.546231537 | 3.86E-06 | down-regulated |
| hsa-mir-378d-2 | -1.578279426 | 7.03E-07 | down-regulated |
| hsa-mir-4529   | -1.581070576 | 0.000305 | down-regulated |
| hsa-mir-3622a  | -1.59744613  | 0.000291 | down-regulated |
| hsa-mir-1225   | -1.638116449 | 0.000241 | down-regulated |
| hsa-mir-28     | -1.664409907 | 3.82E-32 | down-regulated |

|                |              |          |                |
|----------------|--------------|----------|----------------|
| hsa-mir-665    | -1.678715951 | 3.90E-06 | down-regulated |
| hsa-mir-204    | -1.68392924  | 0.000148 | down-regulated |
| hsa-mir-6892   | -1.710485374 | 5.31E-15 | down-regulated |
| hsa-mir-202    | -1.719757649 | 8.96E-06 | down-regulated |
| hsa-mir-4536-1 | -1.770881478 | 1.03E-07 | down-regulated |
| hsa-mir-125b-1 | -1.807333717 | 2.31E-13 | down-regulated |
| hsa-mir-125b-2 | -1.827736547 | 1.83E-13 | down-regulated |
| hsa-mir-3154   | -1.839382785 | 7.32E-06 | down-regulated |
| hsa-mir-1911   | -1.852047351 | 0.001622 | down-regulated |
| hsa-mir-3199-1 | -1.882584817 | 1.36E-09 | down-regulated |
| hsa-mir-4740   | -2.034143717 | 1.37E-06 | down-regulated |
| hsa-mir-6512   | -2.073660813 | 7.41E-06 | down-regulated |
| hsa-mir-4786   | -2.106804329 | 6.44E-15 | down-regulated |
| hsa-mir-4770   | -2.175893606 | 1.80E-05 | down-regulated |
| hsa-mir-3195   | -2.185858337 | 2.40E-06 | down-regulated |
| hsa-mir-5683   | -2.188589685 | 9.42E-08 | down-regulated |
| hsa-mir-6761   | -2.257320156 | 1.86E-13 | down-regulated |
| hsa-mir-30a    | -2.295984841 | 4.15E-30 | down-regulated |
| hsa-mir-23c    | -2.307327464 | 1.38E-12 | down-regulated |
| hsa-mir-145    | -2.313353173 | 4.17E-19 | down-regulated |
| hsa-mir-3199-2 | -2.369415502 | 3.39E-21 | down-regulated |
| hsa-mir-100    | -2.398201662 | 8.87E-19 | down-regulated |
| hsa-mir-99a    | -2.541524002 | 4.65E-16 | down-regulated |
| hsa-mir-195    | -2.615966386 | 3.39E-43 | down-regulated |
| hsa-mir-1247   | -2.724119872 | 7.41E-15 | down-regulated |
| hsa-mir-490    | -2.762544953 | 1.48E-09 | down-regulated |
| hsa-mir-139    | -2.767510093 | 1.59E-46 | down-regulated |
| hsa-mir-6507   | -2.828707663 | 3.76E-12 | down-regulated |
| hsa-mir-383    | -2.85187606  | 1.49E-09 | down-regulated |
| hsa-mir-504    | -2.858511957 | 2.44E-23 | down-regulated |
| hsa-mir-5680   | -2.860567679 | 4.18E-15 | down-regulated |
| hsa-let-7c     | -2.941344923 | 1.11E-25 | down-regulated |
| hsa-mir-1258   | -2.96599182  | 8.18E-15 | down-regulated |
| hsa-mir-4510   | -3.222725941 | 3.25E-14 | down-regulated |
| hsa-mir-548ba  | -3.374711211 | 1.02E-17 | down-regulated |
| hsa-mir-133a-2 | -3.692348955 | 8.54E-31 | down-regulated |
| hsa-mir-133a-1 | -3.741436723 | 3.19E-33 | down-regulated |
| hsa-mir-143    | -3.837712484 | 1.76E-55 | down-regulated |
| hsa-mir-1-1    | -3.954023907 | 5.46E-40 | down-regulated |
| hsa-mir-1-2    | -3.99775601  | 3.08E-42 | down-regulated |
| hsa-mir-133b   | -4.065789658 | 2.57E-29 | down-regulated |
| hsa-mir-1298   | -4.706744665 | 4.45E-34 | down-regulated |
| hsa-mir-1912   | -4.952161313 | 3.73E-28 | down-regulated |

---

Table S2. Hub miRNAs and their target genes.

| miRNA                   | Official ID  | TargetGene | Cumulative weighted context++ score |
|-------------------------|--------------|------------|-------------------------------------|
| hsa-miR-1-1/hsa-miR-1-2 | hsa-miR-1-3p | CORO1C     | -1.08                               |
| hsa-miR-1-1/hsa-miR-1-2 | hsa-miR-1-3p | SMIM14     | -1.03                               |
| hsa-miR-1-1/hsa-miR-1-2 | hsa-miR-1-3p | ARPC3      | -0.99                               |
| hsa-miR-1-1/hsa-miR-1-2 | hsa-miR-1-3p | PTPLAD1    | -0.97                               |
| hsa-miR-1-1/hsa-miR-1-2 | hsa-miR-1-3p | ARCN1      | -0.91                               |
| hsa-miR-1-1/hsa-miR-1-2 | hsa-miR-1-3p | TAGLN2     | -0.85                               |
| hsa-miR-1-1/hsa-miR-1-2 | hsa-miR-1-3p | GJA1       | -0.84                               |
| hsa-miR-1-1/hsa-miR-1-2 | hsa-miR-1-3p | ERMP1      | -0.81                               |
| hsa-miR-1-1/hsa-miR-1-2 | hsa-miR-1-3p | SERP1      | -0.77                               |
| hsa-miR-1-1/hsa-miR-1-2 | hsa-miR-1-3p | TMSB4X     | -0.74                               |
| hsa-miR-1-1/hsa-miR-1-2 | hsa-miR-1-3p | MMD2       | -0.69                               |
| hsa-miR-1-1/hsa-miR-1-2 | hsa-miR-1-3p | BDNF       | -0.68                               |
| hsa-miR-1-1/hsa-miR-1-2 | hsa-miR-1-3p | SLC10A7    | -0.68                               |
| hsa-miR-1-1/hsa-miR-1-2 | hsa-miR-1-3p | G6PD       | -0.68                               |
| hsa-miR-1-1/hsa-miR-1-2 | hsa-miR-1-3p | SRI        | -0.65                               |
| hsa-miR-1-1/hsa-miR-1-2 | hsa-miR-1-3p | GLCCI1     | -0.65                               |
| hsa-miR-1-1/hsa-miR-1-2 | hsa-miR-1-3p | CDK14      | -0.65                               |
| hsa-miR-1-1/hsa-miR-1-2 | hsa-miR-1-3p | RABEPK     | -0.65                               |
| hsa-miR-1-1/hsa-miR-1-2 | hsa-miR-1-3p | C5orf51    | -0.65                               |
| hsa-miR-1-1/hsa-miR-1-2 | hsa-miR-1-3p | RIT2       | -0.64                               |
| hsa-miR-1-1/hsa-miR-1-2 | hsa-miR-1-3p | KCNIP3     | -0.63                               |
| hsa-miR-1-1/hsa-miR-1-2 | hsa-miR-1-3p | TMEM243    | -0.62                               |
| hsa-miR-1-1/hsa-miR-1-2 | hsa-miR-1-3p | POGK       | -0.62                               |
| hsa-miR-1-1/hsa-miR-1-2 | hsa-miR-1-3p | SLC44A1    | -0.61                               |
| hsa-miR-1-1/hsa-miR-1-2 | hsa-miR-1-3p | EBPL       | -0.61                               |
| hsa-miR-1-1/hsa-miR-1-2 | hsa-miR-1-3p | MMD        | -0.61                               |
| hsa-miR-1-1/hsa-miR-1-2 | hsa-miR-1-3p | SRSF9      | -0.61                               |
| hsa-miR-1-1/hsa-miR-1-2 | hsa-miR-1-3p | ANKRD29    | -0.61                               |
| hsa-miR-1-1/hsa-miR-1-2 | hsa-miR-1-3p | UST        | -0.6                                |
| hsa-miR-1-1/hsa-miR-1-2 | hsa-miR-1-3p | EIF1AX     | -0.6                                |
| hsa-miR-1-1/hsa-miR-1-2 | hsa-miR-1-3p | ANXA2      | -0.59                               |
| hsa-miR-1-1/hsa-miR-1-2 | hsa-miR-1-3p | NDRG3      | -0.58                               |
| hsa-miR-1-1/hsa-miR-1-2 | hsa-miR-1-3p | IGF1       | -0.57                               |
| hsa-miR-1-1/hsa-miR-1-2 | hsa-miR-1-3p | MAB21L1    | -0.56                               |
| hsa-miR-1-1/hsa-miR-1-2 | hsa-miR-1-3p | NXT2       | -0.55                               |
| hsa-miR-1-1/hsa-miR-1-2 | hsa-miR-1-3p | SEPT2      | -0.55                               |
| hsa-miR-1-1/hsa-miR-1-2 | hsa-miR-1-3p | C9orf152   | -0.54                               |
| hsa-miR-1-1/hsa-miR-1-2 | hsa-miR-1-3p | PAX3       | -0.54                               |
| hsa-miR-1-1/hsa-miR-1-2 | hsa-miR-1-3p | RABGAPIL   | -0.54                               |
| hsa-miR-1-1/hsa-miR-1-2 | hsa-miR-1-3p | MAL2       | -0.53                               |
| hsa-miR-1-1/hsa-miR-1-2 | hsa-miR-1-3p | MXD1       | -0.53                               |

|                         |              |          |       |
|-------------------------|--------------|----------|-------|
| hsa-miR-1-1/hsa-miR-1-2 | hsa-miR-1-3p | RAB5A    | -0.53 |
| hsa-miR-1-1/hsa-miR-1-2 | hsa-miR-1-3p | TMEM178A | -0.52 |
| hsa-miR-1-1/hsa-miR-1-2 | hsa-miR-1-3p | TTR      | -0.52 |
| hsa-miR-1-1/hsa-miR-1-2 | hsa-miR-1-3p | GPR137C  | -0.52 |
| hsa-miR-1-1/hsa-miR-1-2 | hsa-miR-1-3p | E2F5     | -0.51 |
| hsa-miR-1-1/hsa-miR-1-2 | hsa-miR-1-3p | LASP1    | -0.51 |
| hsa-miR-1-1/hsa-miR-1-2 | hsa-miR-1-3p | C2orf69  | -0.51 |
| hsa-miR-1-1/hsa-miR-1-2 | hsa-miR-1-3p | CCSAP    | -0.51 |
| hsa-miR-1-1/hsa-miR-1-2 | hsa-miR-1-3p | HNRNPU   | -0.5  |
| hsa-miR-1-1/hsa-miR-1-2 | hsa-miR-1-3p | TWF1     | -0.5  |
| hsa-miR-1-1/hsa-miR-1-2 | hsa-miR-1-3p | GPD2     | -0.5  |
| hsa-miR-1-1/hsa-miR-1-2 | hsa-miR-1-3p | SPRED1   | -0.5  |
| hsa-miR-1-1/hsa-miR-1-2 | hsa-miR-1-3p | GCH1     | -0.5  |
| hsa-miR-1-1/hsa-miR-1-2 | hsa-miR-1-3p | TSPAN4   | -0.49 |
| hsa-miR-1-1/hsa-miR-1-2 | hsa-miR-1-3p | EDN1     | -0.49 |
| hsa-miR-1-1/hsa-miR-1-2 | hsa-miR-1-3p | MSANTD2  | -0.49 |
| hsa-miR-1-1/hsa-miR-1-2 | hsa-miR-1-3p | CDON     | -0.49 |
| hsa-miR-1-1/hsa-miR-1-2 | hsa-miR-1-3p | TRIM2    | -0.49 |
| hsa-miR-1-1/hsa-miR-1-2 | hsa-miR-1-3p | VAMP4    | -0.49 |
| hsa-miR-1-1/hsa-miR-1-2 | hsa-miR-1-3p | PAX7     | -0.48 |
| hsa-miR-1-1/hsa-miR-1-2 | hsa-miR-1-3p | TNKS2    | -0.48 |
| hsa-miR-1-1/hsa-miR-1-2 | hsa-miR-1-3p | PPIB     | -0.48 |
| hsa-miR-1-1/hsa-miR-1-2 | hsa-miR-1-3p | GPR6     | -0.48 |
| hsa-miR-1-1/hsa-miR-1-2 | hsa-miR-1-3p | CAAP1    | -0.48 |
| hsa-miR-1-1/hsa-miR-1-2 | hsa-miR-1-3p | PIRT     | -0.48 |
| hsa-miR-1-1/hsa-miR-1-2 | hsa-miR-1-3p | PDCD10   | -0.47 |
| hsa-miR-1-1/hsa-miR-1-2 | hsa-miR-1-3p | ABHD2    | -0.47 |
| hsa-miR-1-1/hsa-miR-1-2 | hsa-miR-1-3p | BSCL2    | -0.47 |
| hsa-miR-1-1/hsa-miR-1-2 | hsa-miR-1-3p | CITED2   | -0.47 |
| hsa-miR-1-1/hsa-miR-1-2 | hsa-miR-1-3p | VAMP2    | -0.47 |
| hsa-miR-1-1/hsa-miR-1-2 | hsa-miR-1-3p | NCL      | -0.46 |
| hsa-miR-1-1/hsa-miR-1-2 | hsa-miR-1-3p | PIGF     | -0.45 |
| hsa-miR-1-1/hsa-miR-1-2 | hsa-miR-1-3p | SH3BGRL3 | -0.45 |
| hsa-miR-1-1/hsa-miR-1-2 | hsa-miR-1-3p | UNC119B  | -0.45 |
| hsa-miR-1-1/hsa-miR-1-2 | hsa-miR-1-3p | CHSY1    | -0.45 |
| hsa-miR-1-1/hsa-miR-1-2 | hsa-miR-1-3p | CCND2    | -0.45 |
| hsa-miR-1-1/hsa-miR-1-2 | hsa-miR-1-3p | ASH2L    | -0.45 |
| hsa-miR-1-1/hsa-miR-1-2 | hsa-miR-1-3p | FBXL14   | -0.45 |
| hsa-miR-1-1/hsa-miR-1-2 | hsa-miR-1-3p | TACR1    | -0.45 |
| hsa-miR-1-1/hsa-miR-1-2 | hsa-miR-1-3p | WDR48    | -0.44 |
| hsa-miR-1-1/hsa-miR-1-2 | hsa-miR-1-3p | CDC42SE1 | -0.44 |
| hsa-miR-1-1/hsa-miR-1-2 | hsa-miR-1-3p | LPPR4    | -0.44 |
| hsa-miR-1-1/hsa-miR-1-2 | hsa-miR-1-3p | AZIN1    | -0.44 |
| hsa-miR-1-1/hsa-miR-1-2 | hsa-miR-1-3p | HIGD1A   | -0.44 |

|                               |                 |          |       |
|-------------------------------|-----------------|----------|-------|
| hsa-miR-1-1/hsa-miR-1-2       | hsa-miR-1-3p    | SEC23B   | -0.44 |
| hsa-miR-1-1/hsa-miR-1-2       | hsa-miR-1-3p    | MIPOL1   | -0.43 |
| hsa-miR-1-1/hsa-miR-1-2       | hsa-miR-1-3p    | CLTC     | -0.43 |
| hsa-miR-1-1/hsa-miR-1-2       | hsa-miR-1-3p    | ZNF281   | -0.43 |
| hsa-miR-1-1/hsa-miR-1-2       | hsa-miR-1-3p    | TPM4     | -0.43 |
| hsa-miR-1-1/hsa-miR-1-2       | hsa-miR-1-3p    | SRPK2    | -0.42 |
| hsa-miR-1-1/hsa-miR-1-2       | hsa-miR-1-3p    | RAB43    | -0.42 |
| hsa-miR-1-1/hsa-miR-1-2       | hsa-miR-1-3p    | HOXB4    | -0.42 |
| hsa-miR-1-1/hsa-miR-1-2       | hsa-miR-1-3p    | MAN1C1   | -0.42 |
| hsa-miR-1-1/hsa-miR-1-2       | hsa-miR-1-3p    | NANP     | -0.42 |
| hsa-miR-1-1/hsa-miR-1-2       | hsa-miR-1-3p    | CPED1    | -0.42 |
| hsa-miR-1-1/hsa-miR-1-2       | hsa-miR-1-3p    | SLC25A30 | -0.42 |
| hsa-miR-1-1/hsa-miR-1-2       | hsa-miR-1-3p    | AP1G1    | -0.41 |
| hsa-miR-1-1/hsa-miR-1-2       | hsa-miR-1-3p    | CNN3     | -0.41 |
| hsa-miR-1-1/hsa-miR-1-2       | hsa-miR-1-3p    | SMARCB1  | -0.41 |
| hsa-miR-1-1/hsa-miR-1-2       | hsa-miR-1-3p    | ADPGK    | -0.41 |
| hsa-miR-1-1/hsa-miR-1-2       | hsa-miR-1-3p    | PGD      | -0.41 |
| hsa-miR-1-1/hsa-miR-1-2       | hsa-miR-1-3p    | PDE7A    | -0.41 |
| hsa-miR-1-1/hsa-miR-1-2       | hsa-miR-1-3p    | ZNF580   | -0.41 |
| hsa-miR-1-1/hsa-miR-1-2       | hsa-miR-1-3p    | TIMP3    | -0.41 |
| hsa-miR-1-1/hsa-miR-1-2       | hsa-miR-1-3p    | TPM3     | -0.41 |
| hsa-miR-1-1/hsa-miR-1-2       | hsa-miR-1-3p    | RNF138   | -0.41 |
| hsa-miR-1-1/hsa-miR-1-2       | hsa-miR-1-3p    | NFATC2   | -0.4  |
| hsa-miR-1-1/hsa-miR-1-2       | hsa-miR-1-3p    | DDX5     | -0.4  |
| hsa-miR-1-1/hsa-miR-1-2       | hsa-miR-1-3p    | ZFP36L1  | -0.4  |
| hsa-miR-1-1/hsa-miR-1-2       | hsa-miR-1-3p    | RASA1    | -0.4  |
| hsa-miR-1-1/hsa-miR-1-2       | hsa-miR-1-3p    | KIF2A    | -0.4  |
| hsa-miR-1-1/hsa-miR-1-2       | hsa-miR-1-3p    | HMGNI    | -0.4  |
| hsa-miR-1-1/hsa-miR-1-2       | hsa-miR-1-3p    | UBE2H    | -0.4  |
| hsa-miR-1-1/hsa-miR-1-2       | hsa-miR-1-3p    | MON2     | -0.4  |
| has-miR-133a-1/has-miR-133a-2 | hsa-miR-133a-3p | FOSL2    | -1.52 |
| has-miR-133a-1/has-miR-133a-2 | hsa-miR-133a-3p | AGRP     | -1.13 |
| has-miR-133a-1/has-miR-133a-2 | hsa-miR-133a-3p | CHCHD6   | -1.12 |
| has-miR-133a-1/has-miR-133a-2 | hsa-miR-133a-3p | LASP1    | -1.11 |
| has-miR-133a-1/has-miR-133a-2 | hsa-miR-133a-3p | TOR2A    | -1    |
| has-miR-133a-1/has-miR-133a-2 | hsa-miR-133a-3p | CD300LB  | -0.97 |
| has-miR-133a-1/has-miR-133a-2 | hsa-miR-133a-3p | BCL2L2   | -0.96 |

|                               |                 |           |       |
|-------------------------------|-----------------|-----------|-------|
| has-miR-133a-1/has-miR-133a-2 | hsa-miR-133a-3p | SYNRG     | -0.96 |
| has-miR-133a-1/has-miR-133a-2 | hsa-miR-133a-3p | TRIQQ     | -0.95 |
| has-miR-133a-1/has-miR-133a-2 | hsa-miR-133a-3p | GDNF      | -0.93 |
| has-miR-133a-1/has-miR-133a-2 | hsa-miR-133a-3p | TAGLN2    | -0.89 |
| has-miR-133a-1/has-miR-133a-2 | hsa-miR-133a-3p | SYDE1     | -0.87 |
| has-miR-133a-1/has-miR-133a-2 | hsa-miR-133a-3p | PCDHGB7   | -0.81 |
| has-miR-133a-1/has-miR-133a-2 | hsa-miR-133a-3p | CORO1C    | -0.81 |
| has-miR-133a-1/has-miR-133a-2 | hsa-miR-133a-3p | WASF2     | -0.78 |
| has-miR-133a-1/has-miR-133a-2 | hsa-miR-133a-3p | SYT2      | -0.74 |
| has-miR-133a-1/has-miR-133a-2 | hsa-miR-133a-3p | PTBP2     | -0.73 |
| has-miR-133a-1/has-miR-133a-2 | hsa-miR-133a-3p | C12orf43  | -0.7  |
| has-miR-133a-1/has-miR-133a-2 | hsa-miR-133a-3p | PAOX      | -0.7  |
| has-miR-133a-1/has-miR-133a-2 | hsa-miR-133a-3p | GABARAPL1 | -0.7  |
| has-miR-133a-1/has-miR-133a-2 | hsa-miR-133a-3p | GPM6A     | -0.7  |
| has-miR-133a-1/has-miR-133a-2 | hsa-miR-133a-3p | SCN2B     | -0.69 |
| has-miR-133a-1/has-miR-133a-2 | hsa-miR-133a-3p | CELF4     | -0.69 |
| has-miR-133a-1/has-miR-133a-2 | hsa-miR-133a-3p | DUSP1     | -0.67 |
| has-miR-133a-1/has-miR-133a-2 | hsa-miR-133a-3p | TPM4      | -0.66 |
| has-miR-133a-1/has-miR-133a-2 | hsa-miR-133a-3p | DCLRE1A   | -0.66 |
| has-miR-133a-1/has-miR-133a-2 | hsa-miR-133a-3p | RAP2C     | -0.65 |
| has-miR-133a-1/has-miR-133a-2 | hsa-miR-133a-3p | ANGPTL4   | -0.64 |
| has-miR-133a-1/has-miR-133a-2 | hsa-miR-133a-3p | DNAJB6    | -0.64 |

|                               |                 |          |       |
|-------------------------------|-----------------|----------|-------|
| has-miR-133a-1/has-miR-133a-2 | hsa-miR-133a-3p | STOM     | -0.62 |
| has-miR-133a-1/has-miR-133a-2 | hsa-miR-133a-3p | GPR161   | -0.62 |
| has-miR-133a-1/has-miR-133a-2 | hsa-miR-133a-3p | NAA40    | -0.61 |
| has-miR-133a-1/has-miR-133a-2 | hsa-miR-133a-3p | NRIP3    | -0.61 |
| has-miR-133a-1/has-miR-133a-2 | hsa-miR-133a-3p | SHISA5   | -0.61 |
| has-miR-133a-1/has-miR-133a-2 | hsa-miR-133a-3p | FOXL2    | -0.61 |
| has-miR-133a-1/has-miR-133a-2 | hsa-miR-133a-3p | DAPK2    | -0.6  |
| has-miR-133a-1/has-miR-133a-2 | hsa-miR-133a-3p | AKAP9    | -0.6  |
| has-miR-133a-1/has-miR-133a-2 | hsa-miR-133a-3p | RDH12    | -0.6  |
| has-miR-133a-1/has-miR-133a-2 | hsa-miR-133a-3p | ZNF280C  | -0.6  |
| has-miR-133a-1/has-miR-133a-2 | hsa-miR-133a-3p | RCE1     | -0.6  |
| has-miR-133a-1/has-miR-133a-2 | hsa-miR-133a-3p | RCL1     | -0.6  |
| has-miR-133a-1/has-miR-133a-2 | hsa-miR-133a-3p | THRAP3   | -0.59 |
| has-miR-133a-1/has-miR-133a-2 | hsa-miR-133a-3p | KIAA1147 | -0.59 |
| has-miR-133a-1/has-miR-133a-2 | hsa-miR-133a-3p | CTBP2    | -0.58 |
| has-miR-133a-1/has-miR-133a-2 | hsa-miR-133a-3p | STX5     | -0.58 |
| has-miR-133a-1/has-miR-133a-2 | hsa-miR-133a-3p | CERS2    | -0.58 |
| has-miR-133a-1/has-miR-133a-2 | hsa-miR-133a-3p | CELF6    | -0.58 |
| has-miR-133a-1/has-miR-133a-2 | hsa-miR-133a-3p | LHX5     | -0.58 |
| has-miR-133a-1/has-miR-133a-2 | hsa-miR-133a-3p | MECOM    | -0.57 |
| has-miR-133a-1/has-miR-133a-2 | hsa-miR-133a-3p | ZNF436   | -0.57 |
| has-miR-133a-1/has-miR-133a-2 | hsa-miR-133a-3p | CSF2     | -0.57 |



|                               |                 |          |       |
|-------------------------------|-----------------|----------|-------|
| has-miR-133a-1/has-miR-133a-2 | hsa-miR-133a-3p | DLST     | -0.56 |
| has-miR-133a-1/has-miR-133a-2 | hsa-miR-133a-3p | PCDHGA11 | -0.56 |
| has-miR-133a-1/has-miR-133a-2 | hsa-miR-133a-3p | EHD2     | -0.56 |
| has-miR-133a-1/has-miR-133a-2 | hsa-miR-133a-3p | COL6A3   | -0.56 |
| has-miR-133a-1/has-miR-133a-2 | hsa-miR-133a-3p | SNX30    | -0.55 |
| has-miR-133a-1/has-miR-133a-2 | hsa-miR-133a-3p | VAT1     | -0.55 |
| has-miR-133a-1/has-miR-133a-2 | hsa-miR-133a-3p | SOGA1    | -0.54 |
| has-miR-133a-1/has-miR-133a-2 | hsa-miR-133a-3p | PCDHGB4  | -0.54 |
| has-miR-133a-1/has-miR-133a-2 | hsa-miR-133a-3p | PCDHGB1  | -0.54 |
| has-miR-133a-1/has-miR-133a-2 | hsa-miR-133a-3p | PCDHGA1  | -0.54 |
| has-miR-133a-1/has-miR-133a-2 | hsa-miR-133a-3p | PCDHGA5  | -0.54 |
| has-miR-133a-1/has-miR-133a-2 | hsa-miR-133a-3p | PCDHGB2  | -0.54 |
| has-miR-133a-1/has-miR-133a-2 | hsa-miR-133a-3p | PCDHGA4  | -0.54 |
| has-miR-133a-1/has-miR-133a-2 | hsa-miR-133a-3p | PCDHGB3  | -0.54 |
| has-miR-133a-1/has-miR-133a-2 | hsa-miR-133a-3p | PCDHGB6  | -0.54 |
| has-miR-133a-1/has-miR-133a-2 | hsa-miR-133a-3p | PCDHGA8  | -0.53 |
| has-miR-133a-1/has-miR-133a-2 | hsa-miR-133a-3p | PCDHGA2  | -0.53 |
| has-miR-133a-1/has-miR-133a-2 | hsa-miR-133a-3p | PCDHGA6  | -0.53 |
| has-miR-133a-1/has-miR-133a-2 | hsa-miR-133a-3p | PCDHGA7  | -0.53 |
| has-miR-133a-1/has-miR-133a-2 | hsa-miR-133a-3p | PCDHGA12 | -0.53 |
| has-miR-133a-1/has-miR-133a-2 | hsa-miR-133a-3p | PCDHGA3  | -0.53 |
| has-miR-133a-1/has-miR-133a-2 | hsa-miR-133a-3p | PCDHGA9  | -0.53 |

|                               |                 |          |       |
|-------------------------------|-----------------|----------|-------|
| has-miR-133a-1/has-miR-133a-2 | hsa-miR-133a-3p | PCDHGC3  | -0.53 |
| has-miR-133a-1/has-miR-133a-2 | hsa-miR-133a-3p | QPCTL    | -0.53 |
| has-miR-133a-1/has-miR-133a-2 | hsa-miR-133a-3p | PCDHGC4  | -0.53 |
| has-miR-133a-1/has-miR-133a-2 | hsa-miR-133a-3p | PCDHGA10 | -0.53 |
| has-miR-133a-1/has-miR-133a-2 | hsa-miR-133a-3p | PCDHGC5  | -0.53 |
| has-miR-133a-1/has-miR-133a-2 | hsa-miR-133a-3p | EFEMP1   | -0.53 |
| has-miR-133a-1/has-miR-133a-2 | hsa-miR-133a-3p | COL5A3   | -0.53 |
| has-miR-133a-1/has-miR-133a-2 | hsa-miR-133a-3p | FKBP2    | -0.52 |
| has-miR-133a-1/has-miR-133a-2 | hsa-miR-133a-3p | CDIP1    | -0.52 |
| has-miR-133a-1/has-miR-133a-2 | hsa-miR-133a-3p | FGF1     | -0.52 |
| has-miR-133a-1/has-miR-133a-2 | hsa-miR-133a-3p | KCTD20   | -0.52 |
| has-miR-133a-1/has-miR-133a-2 | hsa-miR-133a-3p | ARFIP2   | -0.52 |
| has-miR-133a-1/has-miR-133a-2 | hsa-miR-133a-3p | ELF2     | -0.51 |
| has-miR-133a-1/has-miR-133a-2 | hsa-miR-133a-3p | GLI3     | -0.51 |
| has-miR-133a-1/has-miR-133a-2 | hsa-miR-133a-3p | ODC1     | -0.51 |
| has-miR-133a-1/has-miR-133a-2 | hsa-miR-133a-3p | SRRM4    | -0.51 |
| has-miR-133a-1/has-miR-133a-2 | hsa-miR-133a-3p | CAPN15   | -0.5  |
| has-miR-133a-1/has-miR-133a-2 | hsa-miR-133a-3p | VAPB     | -0.5  |
| has-miR-133a-1/has-miR-133a-2 | hsa-miR-133a-3p | NAGS     | -0.5  |
| has-miR-133a-1/has-miR-133a-2 | hsa-miR-133a-3p | GEMIN6   | -0.5  |
| has-miR-133a-1/has-miR-133a-2 | hsa-miR-133a-3p | PLK3     | -0.5  |
| has-miR-133a-1/has-miR-133a-2 | hsa-miR-133a-3p | BCL2L1   | -0.5  |

|                               |                 |               |       |
|-------------------------------|-----------------|---------------|-------|
| has-miR-133a-1/has-miR-133a-2 | hsa-miR-133a-3p | YES1          | -0.5  |
| has-miR-133a-1/has-miR-133a-2 | hsa-miR-133a-3p | CTD-2116N17.1 | -0.5  |
| has-miR-133a-1/has-miR-133a-2 | hsa-miR-133a-3p | MSN           | -0.5  |
| has-miR-133a-1/has-miR-133a-2 | hsa-miR-133a-3p | TRIM56        | -0.5  |
| has-miR-133a-1/has-miR-133a-2 | hsa-miR-133a-3p | RNF44         | -0.5  |
| has-miR-133a-1/has-miR-133a-2 | hsa-miR-133a-3p | AQP1          | -0.49 |
| has-miR-133a-1/has-miR-133a-2 | hsa-miR-133a-3p | CCDC117       | -0.49 |
| has-miR-133a-1/has-miR-133a-2 | hsa-miR-133a-3p | NKX6-3        | -0.49 |
| has-miR-133a-1/has-miR-133a-2 | hsa-miR-133a-3p | FAM156A       | -0.49 |
| has-miR-133a-1/has-miR-133a-2 | hsa-miR-133a-3p | FBXL2         | -0.49 |
| has-miR-133a-1/has-miR-133a-2 | hsa-miR-133a-3p | NCKAP5L       | -0.49 |
| has-miR-133a-1/has-miR-133a-2 | hsa-miR-133a-3p | ANKEF1        | -0.48 |
| has-miR-133a-1/has-miR-133a-2 | hsa-miR-133a-3p | PRRT2         | -0.48 |
| has-miR-133a-1/has-miR-133a-2 | hsa-miR-133a-3p | SMARCD1       | -0.48 |
| has-miR-133a-1/has-miR-133a-2 | hsa-miR-133a-3p | SLC7A8        | -0.48 |
| has-miR-133a-1/has-miR-133a-2 | hsa-miR-133a-3p | JDP2          | -0.47 |
| has-miR-133a-1/has-miR-133a-2 | hsa-miR-133a-3p | NECAP2        | -0.47 |
| has-miR-133a-1/has-miR-133a-2 | hsa-miR-133a-3p | DIP2B         | -0.47 |
| has-miR-133a-1/has-miR-133a-2 | hsa-miR-133a-3p | HPCAL4        | -0.47 |
| has-miR-133a-1/has-miR-133a-2 | hsa-miR-133a-3p | PRRX1         | -0.47 |
| has-miR-133a-1/has-miR-133a-2 | hsa-miR-133a-3p | FBXO27        | -0.46 |
| has-miR-133a-1/has-miR-133a-2 | hsa-miR-133a-3p | TFE3          | -0.46 |

|                               |                 |           |       |
|-------------------------------|-----------------|-----------|-------|
| has-miR-133a-1/has-miR-133a-2 | hsa-miR-133a-3p | PACSIN1   | -0.46 |
| has-miR-133a-1/has-miR-133a-2 | hsa-miR-133a-3p | GRM5      | -0.46 |
| has-miR-133a-1/has-miR-133a-2 | hsa-miR-133a-3p | CAND1     | -0.46 |
| has-miR-133a-1/has-miR-133a-2 | hsa-miR-133a-3p | AFAP1L2   | -0.46 |
| has-miR-133a-1/has-miR-133a-2 | hsa-miR-133a-3p | AZIN1     | -0.45 |
| has-miR-133a-1/has-miR-133a-2 | hsa-miR-133a-3p | ENPEP     | -0.45 |
| has-miR-133a-1/has-miR-133a-2 | hsa-miR-133a-3p | EMP2      | -0.45 |
| has-miR-133a-1/has-miR-133a-2 | hsa-miR-133a-3p | PALD1     | -0.45 |
| has-miR-133a-1/has-miR-133a-2 | hsa-miR-133a-3p | APPL2     | -0.45 |
| has-miR-133a-1/has-miR-133a-2 | hsa-miR-133a-3p | FAM117B   | -0.45 |
| has-miR-133a-1/has-miR-133a-2 | hsa-miR-133a-3p | MARCH9    | -0.45 |
| has-miR-133a-1/has-miR-133a-2 | hsa-miR-133a-3p | ZNF385A   | -0.45 |
| has-miR-133a-1/has-miR-133a-2 | hsa-miR-133a-3p | TK2       | -0.44 |
| has-miR-133a-1/has-miR-133a-2 | hsa-miR-133a-3p | HAPLN1    | -0.44 |
| has-miR-133a-1/has-miR-133a-2 | hsa-miR-133a-3p | YPEL2     | -0.44 |
| has-miR-133a-1/has-miR-133a-2 | hsa-miR-133a-3p | PI4K2B    | -0.43 |
| has-miR-133a-1/has-miR-133a-2 | hsa-miR-133a-3p | KIAA0040  | -0.43 |
| has-miR-133a-1/has-miR-133a-2 | hsa-miR-133a-3p | FURIN     | -0.43 |
| has-miR-133a-1/has-miR-133a-2 | hsa-miR-133a-3p | GZF1      | -0.43 |
| has-miR-133a-1/has-miR-133a-2 | hsa-miR-133a-3p | RAB11FIP4 | -0.43 |
| has-miR-133a-1/has-miR-133a-2 | hsa-miR-133a-3p | PFKFB3    | -0.43 |
| has-miR-133a-1/has-miR-133a-2 | hsa-miR-133a-3p | NME1      | -0.43 |

|                               |                 |          |       |
|-------------------------------|-----------------|----------|-------|
| has-miR-133a-1/has-miR-133a-2 | hsa-miR-133a-3p | DNM2     | -0.43 |
| has-miR-133a-1/has-miR-133a-2 | hsa-miR-133a-3p | PGLS     | -0.42 |
| has-miR-133a-1/has-miR-133a-2 | hsa-miR-133a-3p | TPI1     | -0.42 |
| has-miR-133a-1/has-miR-133a-2 | hsa-miR-133a-3p | PPP2R5D  | -0.42 |
| has-miR-133a-1/has-miR-133a-2 | hsa-miR-133a-3p | SMPD3    | -0.42 |
| has-miR-133a-1/has-miR-133a-2 | hsa-miR-133a-3p | CBLN2    | -0.42 |
| has-miR-133a-1/has-miR-133a-2 | hsa-miR-133a-3p | SNX17    | -0.42 |
| has-miR-133a-1/has-miR-133a-2 | hsa-miR-133a-3p | SOCS5    | -0.42 |
| has-miR-133a-1/has-miR-133a-2 | hsa-miR-133a-3p | HMBOX1   | -0.42 |
| has-miR-133a-1/has-miR-133a-2 | hsa-miR-133a-3p | AP1B1    | -0.42 |
| has-miR-133a-1/has-miR-133a-2 | hsa-miR-133a-3p | EFHD2    | -0.41 |
| has-miR-133a-1/has-miR-133a-2 | hsa-miR-133a-3p | MYCBP2   | -0.41 |
| has-miR-133a-1/has-miR-133a-2 | hsa-miR-133a-3p | SMEK2    | -0.41 |
| has-miR-133a-1/has-miR-133a-2 | hsa-miR-133a-3p | SLC46A1  | -0.41 |
| has-miR-133a-1/has-miR-133a-2 | hsa-miR-133a-3p | NNAT     | -0.41 |
| has-miR-133a-1/has-miR-133a-2 | hsa-miR-133a-3p | ARL6     | -0.41 |
| has-miR-133a-1/has-miR-133a-2 | hsa-miR-133a-3p | MAML3    | -0.41 |
| has-miR-133a-1/has-miR-133a-2 | hsa-miR-133a-3p | KIAA0430 | -0.41 |
| has-miR-133a-1/has-miR-133a-2 | hsa-miR-133a-3p | CDKN2AIP | -0.41 |
| has-miR-133a-1/has-miR-133a-2 | hsa-miR-133a-3p | KIAA1429 | -0.41 |
| has-miR-133a-1/has-miR-133a-2 | hsa-miR-133a-3p | GNAI3    | -0.4  |
| has-miR-133a-1/has-miR-133a-2 | hsa-miR-133a-3p | TXLNA    | -0.4  |

|                               |                 |            |       |
|-------------------------------|-----------------|------------|-------|
| has-miR-133a-1/has-miR-133a-2 | hsa-miR-133a-3p | TTYH3      | -0.4  |
| has-miR-133a-1/has-miR-133a-2 | hsa-miR-133a-3p | NUMA1      | -0.4  |
| has-miR-133a-1/has-miR-133a-2 | hsa-miR-133a-3p | ADCY6      | -0.4  |
| has-miR-133a-1/has-miR-133a-2 | hsa-miR-133a-3p | POLH       | -0.4  |
| has-miR-133a-1/has-miR-133a-2 | hsa-miR-133a-3p | SLC2A12    | -0.4  |
| has-miR-133a-1/has-miR-133a-2 | hsa-miR-133a-3p | DLGAP3     | -0.4  |
| has-miR-133a-1/has-miR-133a-2 | hsa-miR-133a-3p | SPPL3      | -0.4  |
| has-miR-133a-1/has-miR-133a-2 | hsa-miR-133a-3p | MPHOSPH9   | -0.4  |
| has-miR-28                    | has-miR-28-5p   | SLC37A4    | -0.84 |
| has-miR-28                    | has-miR-28-5p   | KCNJ6      | -0.8  |
| has-miR-28                    | has-miR-28-5p   | FOXJ3      | -0.66 |
| has-miR-28                    | has-miR-28-5p   | MTCP1      | -0.62 |
| has-miR-28                    | has-miR-28-5p   | NFE2L2     | -0.61 |
| has-miR-28                    | has-miR-28-5p   | SLC44A5    | -0.57 |
| has-miR-28                    | has-miR-28-5p   | VATIL      | -0.55 |
| has-miR-28                    | has-miR-28-5p   | RHO        | -0.55 |
| has-miR-28                    | has-miR-28-5p   | CNTFR      | -0.54 |
| has-miR-28                    | has-miR-28-5p   | ZKSCAN8    | -0.53 |
| has-miR-28                    | has-miR-28-5p   | GNG12      | -0.52 |
| has-miR-28                    | has-miR-28-5p   | RAP1B      | -0.51 |
| has-miR-28                    | has-miR-28-5p   | AL441883.1 | -0.51 |
| has-miR-28                    | has-miR-28-5p   | MARCH9     | -0.48 |
| has-miR-28                    | has-miR-28-5p   | AS3MT      | -0.48 |
| has-miR-28                    | has-miR-28-5p   | HOXB3      | -0.48 |
| has-miR-28                    | has-miR-28-5p   | GPM6A      | -0.48 |
| has-miR-28                    | has-miR-28-5p   | CDKN2AIP   | -0.48 |
| has-miR-28                    | has-miR-28-5p   | NNAT       | -0.47 |
| has-miR-28                    | has-miR-28-5p   | TMEM260    | -0.47 |
| has-miR-28                    | has-miR-28-5p   | GON4L      | -0.45 |
| has-miR-28                    | has-miR-28-5p   | PSMF1      | -0.44 |
| has-miR-28                    | has-miR-28-5p   | EOMES      | -0.44 |
| has-miR-28                    | has-miR-28-5p   | MCM9       | -0.41 |
| has-miR-28                    | has-miR-28-5p   | LYPD3      | -0.4  |
| has-miR-28                    | has-miR-28-5p   | CCDC113    | -0.4  |
| has-miR-28                    | has-miR-28-5p   | POU6F2     | -0.4  |

|             |                |              |       |
|-------------|----------------|--------------|-------|
| has-miR-139 | has-miR-139-3p | AL590235.1   | -2.48 |
| has-miR-139 | has-miR-139-3p | CDR1as       | -2.01 |
| has-miR-139 | has-miR-139-3p | FN3K         | -1.39 |
| has-miR-139 | has-miR-139-3p | RP11-297N6.4 | -1    |
| has-miR-139 | has-miR-139-3p | ANXA2R       | -0.79 |
| has-miR-139 | has-miR-139-3p | BLOC1S6      | -0.69 |
| has-miR-139 | has-miR-139-3p | C2CD4D       | -0.69 |
| has-miR-139 | has-miR-139-3p | C7orf73      | -0.68 |
| has-miR-139 | has-miR-139-3p | XCL2         | -0.68 |
| has-miR-139 | has-miR-139-3p | ELK1         | -0.67 |
| has-miR-139 | has-miR-139-3p | ZNF232       | -0.67 |
| has-miR-139 | has-miR-139-3p | RAB1A        | -0.63 |
| has-miR-139 | has-miR-139-3p | ARHGDIB      | -0.62 |
| has-miR-139 | has-miR-139-3p | AP000974.1   | -0.62 |
| has-miR-139 | has-miR-139-3p | RPS15A       | -0.62 |
| has-miR-139 | has-miR-139-3p | RBMXL2       | -0.6  |
| has-miR-139 | has-miR-139-3p | PAX1         | -0.59 |
| has-miR-139 | has-miR-139-3p | C19orf35     | -0.58 |
| has-miR-139 | has-miR-139-3p | SIX5         | -0.58 |
| has-miR-139 | has-miR-139-3p | OPTC         | -0.57 |
| has-miR-139 | has-miR-139-3p | ARPC3        | -0.57 |
| has-miR-139 | has-miR-139-3p | ZNF880       | -0.57 |

|             |                |                            |       |
|-------------|----------------|----------------------------|-------|
| has-miR-139 | has-miR-139-3p | LY6G5B                     | -0.56 |
| has-miR-139 | has-miR-139-3p | AGPAT3                     | -0.56 |
| has-miR-139 | has-miR-139-3p | RHOH                       | -0.56 |
| has-miR-139 | has-miR-139-3p | GNB5                       | -0.55 |
| has-miR-139 | has-miR-139-3p | SDCBP                      | -0.55 |
| has-miR-139 | has-miR-139-3p | LDLRAP1                    | -0.54 |
| has-miR-139 | has-miR-139-3p | TTLL6                      | -0.54 |
| has-miR-139 | has-miR-139-3p | XCL1                       | -0.54 |
| has-miR-139 | has-miR-139-3p | SERPINE1                   | -0.53 |
| has-miR-139 | has-miR-139-3p | ORM2                       | -0.53 |
| has-miR-139 | has-miR-139-3p | CXorf40B                   | -0.52 |
| has-miR-139 | has-miR-139-3p | RAX2                       | -0.51 |
| has-miR-139 | has-miR-139-3p | LINC00632                  | -0.51 |
| has-miR-139 | has-miR-139-3p | FBXO17                     | -0.51 |
| has-miR-139 | has-miR-139-3p | RAD54B                     | -0.51 |
| has-miR-139 | has-miR-139-3p | CSNK2B-<br>LY6G5B-<br>1181 | -0.5  |
| has-miR-139 | has-miR-139-3p | TMEM221                    | -0.5  |
| has-miR-139 | has-miR-139-3p | PFDN1                      | -0.49 |
| has-miR-139 | has-miR-139-3p | KLHL26                     | -0.49 |
| has-miR-139 | has-miR-139-3p | PHOX2A                     | -0.49 |
| has-miR-139 | has-miR-139-3p | AC010336.1                 | -0.49 |



|             |                |          |       |
|-------------|----------------|----------|-------|
| has-miR-139 | has-miR-139-3p | C1QL4    | -0.49 |
| has-miR-139 | has-miR-139-3p | TPM2     | -0.49 |
| has-miR-139 | has-miR-139-3p | RPL22    | -0.49 |
| has-miR-139 | has-miR-139-3p | PIGS     | -0.49 |
| has-miR-139 | has-miR-139-3p | UBE2G1   | -0.48 |
| has-miR-139 | has-miR-139-3p | FAM161A  | -0.48 |
| has-miR-139 | has-miR-139-3p | RNF220   | -0.48 |
| has-miR-139 | has-miR-139-3p | CCDC8    | -0.48 |
| has-miR-139 | has-miR-139-3p | BCL2L14  | -0.48 |
| has-miR-139 | has-miR-139-3p | KIAA0101 | -0.48 |
| has-miR-139 | has-miR-139-3p | CTU1     | -0.47 |
| has-miR-139 | has-miR-139-3p | C1orf105 | -0.47 |
| has-miR-139 | has-miR-139-3p | ISG20L2  | -0.46 |
| has-miR-139 | has-miR-139-3p | MS4A15   | -0.46 |
| has-miR-139 | has-miR-139-3p | C10orf85 | -0.46 |
| has-miR-139 | has-miR-139-3p | GSC2     | -0.46 |
| has-miR-139 | has-miR-139-3p | MIEF1    | -0.46 |
| has-miR-139 | has-miR-139-3p | GPR3     | -0.45 |
| has-miR-139 | has-miR-139-3p | ZBTB9    | -0.45 |
| has-miR-139 | has-miR-139-3p | SLC44A4  | -0.45 |
| has-miR-139 | has-miR-139-3p | MLC1     | -0.45 |
| has-miR-139 | has-miR-139-3p | CD6      | -0.45 |

|             |                |               |       |
|-------------|----------------|---------------|-------|
| has-miR-139 | has-miR-139-3p | RP11-644F5.10 | -0.44 |
| has-miR-139 | has-miR-139-3p | GJB1          | -0.44 |
| has-miR-139 | has-miR-139-3p | NOB1          | -0.44 |
| has-miR-139 | has-miR-139-3p | HAP1          | -0.44 |
| has-miR-139 | has-miR-139-3p | REM1          | -0.44 |
| has-miR-139 | has-miR-139-3p | GLB1L         | -0.43 |
| has-miR-139 | has-miR-139-3p | CLRN1         | -0.43 |
| has-miR-139 | has-miR-139-3p | BLOC1S3       | -0.43 |
| has-miR-139 | has-miR-139-3p | RHBG          | -0.43 |
| has-miR-139 | has-miR-139-3p | NKX3-1        | -0.43 |
| has-miR-139 | has-miR-139-3p | GPR123        | -0.42 |
| has-miR-139 | has-miR-139-3p | BCL6          | -0.42 |
| has-miR-139 | has-miR-139-3p | MT1H          | -0.42 |
| has-miR-139 | has-miR-139-3p | VGLL2         | -0.42 |
| has-miR-139 | has-miR-139-3p | SNX20         | -0.42 |
| has-miR-139 | has-miR-139-3p | ADAM11        | -0.42 |
| has-miR-139 | has-miR-139-3p | CCL22         | -0.41 |
| has-miR-139 | has-miR-139-3p | PRMT8         | -0.41 |
| has-miR-139 | has-miR-139-3p | KIF18B        | -0.41 |
| has-miR-139 | has-miR-139-3p | SRCRB4D       | -0.41 |
| has-miR-139 | has-miR-139-3p | CCDC71L       | -0.41 |
| has-miR-139 | has-miR-139-3p | PNPLA3        | -0.41 |

|             |                |          |       |
|-------------|----------------|----------|-------|
| has-miR-139 | has-miR-139-3p | GP6      | -0.41 |
| has-miR-139 | has-miR-139-3p | UGT2A1   | -0.41 |
| has-miR-139 | has-miR-139-3p | CD164L2  | -0.41 |
| has-miR-139 | has-miR-139-3p | SYT2     | -0.41 |
| has-miR-139 | has-miR-139-3p | SGK223   | -0.41 |
| has-miR-139 | has-miR-139-3p | PRRG3    | -0.41 |
| has-miR-139 | has-miR-139-3p | C17orf74 | -0.41 |
| has-miR-139 | has-miR-139-3p | HCRT     | -0.41 |
| has-miR-139 | has-miR-139-3p | C7orf65  | -0.41 |
| has-miR-139 | has-miR-139-3p | CMTM5    | -0.4  |
| has-miR-139 | has-miR-139-3p | CLCN6    | -0.4  |
| has-miR-139 | has-miR-139-3p | CALN1    | -0.4  |
| has-miR-139 | has-miR-139-3p | PACSIN1  | -0.4  |
| has-miR-139 | has-miR-139-3p | PRDM7    | -0.4  |
| has-miR-143 | has-miR-143-3p | C1orf74  | -0.8  |
| has-miR-143 | has-miR-143-3p | ITM2B    | -0.7  |
| has-miR-143 | has-miR-143-3p | SLC25A15 | -0.69 |
| has-miR-143 | has-miR-143-3p | SLC30A8  | -0.64 |
| has-miR-143 | has-miR-143-3p | MSI2     | -0.64 |
| has-miR-143 | has-miR-143-3p | TMOD2    | -0.63 |
| has-miR-143 | has-miR-143-3p | ABHD14A  | -0.62 |
| has-miR-143 | has-miR-143-3p | TSC22D3  | -0.61 |

|             |                |            |       |
|-------------|----------------|------------|-------|
| has-miR-143 | has-miR-143-3p | UBXN2B     | -0.6  |
| has-miR-143 | has-miR-143-3p | FOSL2      | -0.59 |
| has-miR-143 | has-miR-143-3p | LMO4       | -0.58 |
| has-miR-143 | has-miR-143-3p | ASAP3      | -0.56 |
| has-miR-143 | has-miR-143-3p | DKFZP779J2 |       |
| has-miR-143 | has-miR-143-3p | 370        | -0.54 |
| has-miR-143 | has-miR-143-3p | CCDC58     | -0.52 |
| has-miR-143 | has-miR-143-3p | CRELD1     | -0.51 |
| has-miR-143 | has-miR-143-3p | UBE2E3     | -0.51 |
| has-miR-143 | has-miR-143-3p | VAPB       | -0.51 |
| has-miR-143 | has-miR-143-3p | ZNF570     | -0.47 |
| has-miR-143 | has-miR-143-3p | UBE2E1     | -0.46 |
| has-miR-143 | has-miR-143-3p | IGFBP5     | -0.45 |
| has-miR-143 | has-miR-143-3p | INO80D     | -0.44 |
| has-miR-143 | has-miR-143-3p | CYB561D1   | -0.43 |
| has-miR-143 | has-miR-143-3p | ATP6V1A    | -0.43 |
| has-miR-143 | has-miR-143-3p | NECAP1     | -0.42 |
| has-miR-143 | has-miR-143-3p | PAN3       | -0.42 |
| has-miR-143 | has-miR-143-3p | TMEM134    | -0.41 |
| has-miR-143 | has-miR-143-3p | PCMT1      | -0.41 |
| has-miR-143 | has-miR-143-3p | RASGEF1B   | -0.41 |
| has-miR-143 | has-miR-143-3p | POLH       | -0.4  |
| has-miR-143 | has-miR-143-3p | MEDAG      | -0.4  |

|             |                |          |       |
|-------------|----------------|----------|-------|
| has-miR-145 | has-miR-145-5p | CSRNP2   | -1.04 |
| has-miR-145 | has-miR-145-5p | FSCN1    | -1.03 |
| has-miR-145 | has-miR-145-5p | ABHD17C  | -1.03 |
| has-miR-145 | has-miR-145-5p | MYO5A    | -0.84 |
| has-miR-145 | has-miR-145-5p | FLI1     | -0.84 |
| has-miR-145 | has-miR-145-5p | ABRACL   | -0.79 |
| has-miR-145 | has-miR-145-5p | MBTD1    | -0.79 |
| has-miR-145 | has-miR-145-5p | BLOC1S6  | -0.76 |
| has-miR-145 | has-miR-145-5p | SWAP70   | -0.76 |
| has-miR-145 | has-miR-145-5p | TPT1     | -0.73 |
| has-miR-145 | has-miR-145-5p | HHEX     | -0.71 |
| has-miR-145 | has-miR-145-5p | KCNA4    | -0.67 |
| has-miR-145 | has-miR-145-5p | GLIS1    | -0.65 |
| has-miR-145 | has-miR-145-5p | ITGB8    | -0.64 |
| has-miR-145 | has-miR-145-5p | DAW1     | -0.64 |
| has-miR-145 | has-miR-145-5p | PPP3CA   | -0.6  |
| has-miR-145 | has-miR-145-5p | FKBP3    | -0.6  |
| has-miR-145 | has-miR-145-5p | YTHDF2   | -0.59 |
| has-miR-145 | has-miR-145-5p | SKP1     | -0.58 |
| has-miR-145 | has-miR-145-5p | C13orf35 | -0.57 |
| has-miR-145 | has-miR-145-5p | ACTG1    | -0.54 |
| has-miR-145 | has-miR-145-5p | PGM3     | -0.54 |

|             |                |         |       |
|-------------|----------------|---------|-------|
| has-miR-145 | has-miR-145-5p | SNX24   | -0.53 |
| has-miR-145 | has-miR-145-5p | DST     | -0.52 |
| has-miR-145 | has-miR-145-5p | TFRC    | -0.51 |
| has-miR-145 | has-miR-145-5p | RNF170  | -0.51 |
| has-miR-145 | has-miR-145-5p | AKAP9   | -0.5  |
| has-miR-145 | has-miR-145-5p | OTOR    | -0.5  |
| has-miR-145 | has-miR-145-5p | MPLKIP  | -0.5  |
| has-miR-145 | has-miR-145-5p | RTKN    | -0.5  |
| has-miR-145 | has-miR-145-5p | BIRC2   | -0.49 |
| has-miR-145 | has-miR-145-5p | ADD3    | -0.49 |
| has-miR-145 | has-miR-145-5p | MKL2    | -0.49 |
| has-miR-145 | has-miR-145-5p | MDFIC   | -0.49 |
| has-miR-145 | has-miR-145-5p | MAP3K1  | -0.49 |
| has-miR-145 | has-miR-145-5p | UXS1    | -0.49 |
| has-miR-145 | has-miR-145-5p | SPSB4   | -0.49 |
| has-miR-145 | has-miR-145-5p | ABCE1   | -0.48 |
| has-miR-145 | has-miR-145-5p | FAM135A | -0.48 |
| has-miR-145 | has-miR-145-5p | ENHO    | -0.47 |
| has-miR-145 | has-miR-145-5p | SRGAP2  | -0.47 |
| has-miR-145 | has-miR-145-5p | SEMA3A  | -0.46 |
| has-miR-145 | has-miR-145-5p | PLCE1   | -0.46 |
| has-miR-145 | has-miR-145-5p | CASZ1   | -0.46 |

|             |                |           |       |
|-------------|----------------|-----------|-------|
| has-miR-145 | has-miR-145-5p | MEST      | -0.45 |
| has-miR-145 | has-miR-145-5p | GALNT1    | -0.45 |
| has-miR-145 | has-miR-145-5p | ACTB      | -0.45 |
| has-miR-145 | has-miR-145-5p | TMEM178A  | -0.45 |
| has-miR-145 | has-miR-145-5p | FGF5      | -0.44 |
| has-miR-145 | has-miR-145-5p | AGFG1     | -0.44 |
| has-miR-145 | has-miR-145-5p | UBXN4     | -0.44 |
| has-miR-145 | has-miR-145-5p | EXOC8     | -0.43 |
| has-miR-145 | has-miR-145-5p | GRB10     | -0.43 |
| has-miR-145 | has-miR-145-5p | ERG       | -0.43 |
| has-miR-145 | has-miR-145-5p | PPP4R2    | -0.43 |
| has-miR-145 | has-miR-145-5p | DUSP6     | -0.42 |
| has-miR-145 | has-miR-145-5p | DAB2      | -0.42 |
| has-miR-145 | has-miR-145-5p | DERL2     | -0.42 |
| has-miR-145 | has-miR-145-5p | GABARAPL2 | -0.42 |
| has-miR-145 | has-miR-145-5p | ABHD17B   | -0.41 |
| has-miR-145 | has-miR-145-5p | SCAMP3    | -0.41 |
| has-miR-145 | has-miR-145-5p | PAPD4     | -0.41 |
| has-miR-145 | has-miR-145-5p | SERGEF    | -0.41 |
| has-miR-145 | has-miR-145-5p | VASN      | -0.41 |
| has-miR-145 | has-miR-145-5p | PRPSAP2   | -0.41 |
| has-miR-145 | has-miR-145-5p | CITED2    | -0.41 |

|             |                |          |       |
|-------------|----------------|----------|-------|
| has-miR-145 | has-miR-145-5p | CTNNBIP1 | -0.41 |
| has-miR-145 | has-miR-145-5p | KLF5     | -0.41 |
| has-miR-145 | has-miR-145-5p | GMFB     | -0.4  |
| has-miR-145 | has-miR-145-5p | SOX9     | -0.4  |
| has-miR-145 | has-miR-145-5p | MPZL2    | -0.4  |
| has-miR-145 | has-miR-145-5p | DACH1    | -0.4  |
| has-miR-145 | has-miR-145-5p | RGS7     | -0.4  |
| has-miR-145 | has-miR-145-5p | NEDD9    | -0.4  |
| has-miR-145 | has-miR-145-5p | ST6GALNA | -0.4  |
| has-miR-145 | has-miR-145-5p | C3       | -0.4  |
| has-miR-145 | has-miR-145-5p | ADPGK    | -0.4  |
| has-miR-195 | has-miR-195-5p | ARL2     | -1.28 |
| has-miR-195 | has-miR-195-5p | CCNE1    | -1.07 |
| has-miR-195 | has-miR-195-5p | SPRED1   | -0.92 |
| has-miR-195 | has-miR-195-5p | PLSCR4   | -0.91 |
| has-miR-195 | has-miR-195-5p | DNAJB4   | -0.9  |
| has-miR-195 | has-miR-195-5p | WNT3A    | -0.9  |
| has-miR-195 | has-miR-195-5p | TNFSF13B | -0.89 |
| has-miR-195 | has-miR-195-5p | ZBTB34   | -0.89 |
| has-miR-195 | has-miR-195-5p | LSM11    | -0.88 |
| has-miR-195 | has-miR-195-5p | CYB561D1 | -0.87 |
| has-miR-195 | has-miR-195-5p | ANO3     | -0.86 |
| has-miR-195 | has-miR-195-5p | FP15737  | -0.85 |



|             |                |          |       |
|-------------|----------------|----------|-------|
| has-miR-195 | has-miR-195-5p | TMEM74B  | -0.85 |
| has-miR-195 | has-miR-195-5p | PHF19    | -0.83 |
| has-miR-195 | has-miR-195-5p | WEE1     | -0.83 |
| has-miR-195 | has-miR-195-5p | BCL2L2   | -0.82 |
| has-miR-195 | has-miR-195-5p | WNT7A    | -0.81 |
| has-miR-195 | has-miR-195-5p | PTH      | -0.81 |
| has-miR-195 | has-miR-195-5p | AQP11    | -0.8  |
| has-miR-195 | has-miR-195-5p | MAMSTR   | -0.8  |
| has-miR-195 | has-miR-195-5p | CDCA4    | -0.8  |
| has-miR-195 | has-miR-195-5p | HTR2A    | -0.79 |
| has-miR-195 | has-miR-195-5p | APLN     | -0.78 |
| has-miR-195 | has-miR-195-5p | SNCG     | -0.78 |
| has-miR-195 | has-miR-195-5p | CDC42SE2 | -0.78 |
| has-miR-195 | has-miR-195-5p | CCDC19   | -0.78 |
| has-miR-195 | has-miR-195-5p | SLC9A6   | -0.77 |
| has-miR-195 | has-miR-195-5p | SLC9A8   | -0.76 |
| has-miR-195 | has-miR-195-5p | NEK10    | -0.75 |
| has-miR-195 | has-miR-195-5p | MYB      | -0.75 |
| has-miR-195 | has-miR-195-5p | DESI1    | -0.75 |
| has-miR-195 | has-miR-195-5p | BTLA     | -0.75 |
| has-miR-195 | has-miR-195-5p | KRTAP4-4 | -0.74 |
| has-miR-195 | has-miR-195-5p | SPRYD3   | -0.73 |

|             |                |          |       |
|-------------|----------------|----------|-------|
| has-miR-195 | has-miR-195-5p | ZNF622   | -0.73 |
| has-miR-195 | has-miR-195-5p | RBM6     | -0.72 |
| has-miR-195 | has-miR-195-5p | OMG      | -0.72 |
| has-miR-195 | has-miR-195-5p | SIX6     | -0.71 |
| has-miR-195 | has-miR-195-5p | FGF7     | -0.71 |
| has-miR-195 | has-miR-195-5p | TMEM100  | -0.71 |
| has-miR-195 | has-miR-195-5p | EMC4     | -0.71 |
| has-miR-195 | has-miR-195-5p | RAB9B    | -0.69 |
| has-miR-195 | has-miR-195-5p | RASGEF1B | -0.69 |
| has-miR-195 | has-miR-195-5p | C2orf42  | -0.68 |
| has-miR-195 | has-miR-195-5p | PURA     | -0.67 |
| has-miR-195 | has-miR-195-5p | SIRT4    | -0.67 |
| has-miR-195 | has-miR-195-5p | KDSR     | -0.64 |
| has-miR-195 | has-miR-195-5p | PTPN3    | -0.64 |
| has-miR-195 | has-miR-195-5p | CDC37L1  | -0.64 |
| has-miR-195 | has-miR-195-5p | GNAI3    | -0.63 |
| has-miR-195 | has-miR-195-5p | AKT3     | -0.63 |
| has-miR-195 | has-miR-195-5p | C1QL3    | -0.63 |
| has-miR-195 | has-miR-195-5p | CNOT6L   | -0.62 |
| has-miR-195 | has-miR-195-5p | C1orf21  | -0.62 |
| has-miR-195 | has-miR-195-5p | ZNF697   | -0.62 |
| has-miR-195 | has-miR-195-5p | PAPPA    | -0.61 |

|             |                |            |       |
|-------------|----------------|------------|-------|
| has-miR-195 | has-miR-195-5p | ZBTB16     | -0.61 |
| has-miR-195 | has-miR-195-5p | KCNJ2      | -0.61 |
| has-miR-195 | has-miR-195-5p | SMPD1      | -0.61 |
| has-miR-195 | has-miR-195-5p | CCND1      | -0.61 |
| has-miR-195 | has-miR-195-5p | AC068987.1 | -0.61 |
| has-miR-195 | has-miR-195-5p | BTG2       | -0.6  |
| has-miR-195 | has-miR-195-5p | TMEM55A    | -0.6  |
| has-miR-195 | has-miR-195-5p | UBE2V1     | -0.6  |
| has-miR-195 | has-miR-195-5p | RSPO3      | -0.59 |
| has-miR-195 | has-miR-195-5p | AXIN2      | -0.59 |
| has-miR-195 | has-miR-195-5p | SETD3      | -0.59 |
| has-miR-195 | has-miR-195-5p | RNF144B    | -0.59 |
| has-miR-195 | has-miR-195-5p | GPR63      | -0.59 |
| has-miR-195 | has-miR-195-5p | SMAD7      | -0.58 |
| has-miR-195 | has-miR-195-5p | FAM133B    | -0.58 |
| has-miR-195 | has-miR-195-5p | N4BP1      | -0.58 |
| has-miR-195 | has-miR-195-5p | CACUL1     | -0.58 |
| has-miR-195 | has-miR-195-5p | CCND2      | -0.58 |
| has-miR-195 | has-miR-195-5p | RPL14      | -0.57 |
| has-miR-195 | has-miR-195-5p | TFCP2L1    | -0.57 |
| has-miR-195 | has-miR-195-5p | KCNN4      | -0.57 |
| has-miR-195 | has-miR-195-5p | IPPK       | -0.57 |

|             |                |         |       |
|-------------|----------------|---------|-------|
| has-miR-195 | has-miR-195-5p | DLEU7   | -0.57 |
| has-miR-195 | has-miR-195-5p | WIPI2   | -0.57 |
| has-miR-195 | has-miR-195-5p | PDK4    | -0.57 |
| has-miR-195 | has-miR-195-5p | AK4     | -0.56 |
| has-miR-195 | has-miR-195-5p | TGIF2   | -0.56 |
| has-miR-195 | has-miR-195-5p | MKNK1   | -0.56 |
| has-miR-195 | has-miR-195-5p | PPAP2A  | -0.56 |
| has-miR-195 | has-miR-195-5p | TLK1    | -0.56 |
| has-miR-195 | has-miR-195-5p | PCDHA11 | -0.56 |
| has-miR-195 | has-miR-195-5p | PTPN4   | -0.56 |
| has-miR-195 | has-miR-195-5p | ATG9A   | -0.56 |
| has-miR-195 | has-miR-195-5p | KIF23   | -0.55 |
| has-miR-195 | has-miR-195-5p | UNC80   | -0.55 |
| has-miR-195 | has-miR-195-5p | DGCR2   | -0.55 |
| has-miR-195 | has-miR-195-5p | HMGA2   | -0.55 |
| has-miR-195 | has-miR-195-5p | USP25   | -0.55 |
| has-miR-195 | has-miR-195-5p | PCDHAC2 | -0.55 |
| has-miR-195 | has-miR-195-5p | MOB4    | -0.55 |
| has-miR-195 | has-miR-195-5p | VEGFA   | -0.55 |
| has-miR-195 | has-miR-195-5p | SEPT2   | -0.55 |
| has-miR-195 | has-miR-195-5p | FAM73A  | -0.55 |
| has-miR-195 | has-miR-195-5p | ARL3    | -0.54 |

|             |                |         |       |
|-------------|----------------|---------|-------|
| has-miR-195 | has-miR-195-5p | SYS1    | -0.54 |
| has-miR-195 | has-miR-195-5p | CDK5R1  | -0.54 |
| has-miR-195 | has-miR-195-5p | MAFK    | -0.54 |
| has-miR-195 | has-miR-195-5p | KIF1B   | -0.54 |
| has-miR-195 | has-miR-195-5p | SLC35G1 | -0.54 |
| has-miR-195 | has-miR-195-5p | GSKIP   | -0.53 |
| has-miR-195 | has-miR-195-5p | PEX13   | -0.53 |
| has-miR-195 | has-miR-195-5p | SHOC2   | -0.53 |
| has-miR-195 | has-miR-195-5p | VAPB    | -0.53 |
| has-miR-195 | has-miR-195-5p | RNF138  | -0.53 |
| has-miR-195 | has-miR-195-5p | CAPZA2  | -0.52 |
| has-miR-195 | has-miR-195-5p | RUNX1T1 | -0.52 |
| has-miR-195 | has-miR-195-5p | CBX4    | -0.52 |
| has-miR-195 | has-miR-195-5p | SRPR    | -0.52 |
| has-miR-195 | has-miR-195-5p | KLHL18  | -0.52 |
| has-miR-195 | has-miR-195-5p | PLAG1   | -0.52 |
| has-miR-195 | has-miR-195-5p | ZMAT3   | -0.51 |
| has-miR-195 | has-miR-195-5p | SLC7A2  | -0.51 |
| has-miR-195 | has-miR-195-5p | TEX19   | -0.51 |
| has-miR-195 | has-miR-195-5p | RASSF8  | -0.51 |
| has-miR-195 | has-miR-195-5p | ANXA11  | -0.51 |
| has-miR-195 | has-miR-195-5p | SH3GL2  | -0.51 |

|             |                |            |       |
|-------------|----------------|------------|-------|
| has-miR-195 | has-miR-195-5p | BTAF1      | -0.51 |
| has-miR-195 | has-miR-195-5p | CRKL       | -0.51 |
| has-miR-195 | has-miR-195-5p | SYNRG      | -0.51 |
| has-miR-195 | has-miR-195-5p | CLDN12     | -0.51 |
| has-miR-195 | has-miR-195-5p | PTPRR      | -0.51 |
| has-miR-195 | has-miR-195-5p | IKBKB      | -0.5  |
| has-miR-195 | has-miR-195-5p | CHEK1      | -0.5  |
| has-miR-195 | has-miR-195-5p | HSPE1-MOB4 | -0.5  |
| has-miR-195 | has-miR-195-5p | RPS6KA3    | -0.5  |
| has-miR-195 | has-miR-195-5p | MYBL1      | -0.5  |
| has-miR-195 | has-miR-195-5p | SALL4      | -0.5  |
| has-miR-195 | has-miR-195-5p | ARMC12     | -0.5  |
| has-miR-195 | has-miR-195-5p | FGF2       | -0.49 |
| has-miR-195 | has-miR-195-5p | FASN       | -0.49 |
| has-miR-195 | has-miR-195-5p | RAB30      | -0.49 |
| has-miR-195 | has-miR-195-5p | HSPA4L     | -0.49 |
| has-miR-195 | has-miR-195-5p | PLEKHA5    | -0.49 |
| has-miR-195 | has-miR-195-5p | MEOX2      | -0.49 |
| has-miR-195 | has-miR-195-5p | CA8        | -0.49 |
| has-miR-195 | has-miR-195-5p | AMER1      | -0.49 |
| has-miR-195 | has-miR-195-5p | UBE2Q1     | -0.49 |
| has-miR-195 | has-miR-195-5p | UBE4B      | -0.49 |

|             |                |          |       |
|-------------|----------------|----------|-------|
| has-miR-195 | has-miR-195-5p | FAM179B  | -0.49 |
| has-miR-195 | has-miR-195-5p | IST1     | -0.48 |
| has-miR-195 | has-miR-195-5p | ACTR2    | -0.48 |
| has-miR-195 | has-miR-195-5p | DYRK1B   | -0.48 |
| has-miR-195 | has-miR-195-5p | CYB561   | -0.48 |
| has-miR-195 | has-miR-195-5p | CCNT2    | -0.48 |
| has-miR-195 | has-miR-195-5p | SYT3     | -0.48 |
| has-miR-195 | has-miR-195-5p | KIAA0247 | -0.48 |
| has-miR-195 | has-miR-195-5p | GAREM    | -0.48 |
| has-miR-195 | has-miR-195-5p | ZBTB46   | -0.48 |
| has-miR-195 | has-miR-195-5p | RBMS1    | -0.48 |
| has-miR-195 | has-miR-195-5p | POLR3F   | -0.48 |
| has-miR-195 | has-miR-195-5p | MED26    | -0.48 |
| has-miR-195 | has-miR-195-5p | PPM1E    | -0.48 |
| has-miR-195 | has-miR-195-5p | DLL1     | -0.48 |
| has-miR-195 | has-miR-195-5p | UBQLNL   | -0.48 |
| has-miR-195 | has-miR-195-5p | SLC2A14  | -0.47 |
| has-miR-195 | has-miR-195-5p | TBPL1    | -0.47 |
| has-miR-195 | has-miR-195-5p | NDP      | -0.47 |
| has-miR-195 | has-miR-195-5p | BTRC     | -0.47 |
| has-miR-195 | has-miR-195-5p | BPIFA1   | -0.47 |
| has-miR-195 | has-miR-195-5p | TMEM161B | -0.47 |

|             |                |           |       |
|-------------|----------------|-----------|-------|
| has-miR-195 | has-miR-195-5p | WDR82     | -0.47 |
| has-miR-195 | has-miR-195-5p | NFS1      | -0.47 |
| has-miR-195 | has-miR-195-5p | ALOX12    | -0.47 |
| has-miR-195 | has-miR-195-5p | GADD45G   | -0.47 |
| has-miR-195 | has-miR-195-5p | FBXW7     | -0.47 |
| has-miR-195 | has-miR-195-5p | SEMA6D    | -0.47 |
| has-miR-195 | has-miR-195-5p | EPT1      | -0.47 |
| has-miR-195 | has-miR-195-5p | RNF24     | -0.47 |
| has-miR-195 | has-miR-195-5p | SPAG7     | -0.47 |
| has-miR-195 | has-miR-195-5p | VTI1B     | -0.47 |
| has-miR-195 | has-miR-195-5p | YWHAH     | -0.47 |
| has-miR-195 | has-miR-195-5p | WBP11     | -0.47 |
| has-miR-195 | has-miR-195-5p | TMEM55B   | -0.47 |
| has-miR-195 | has-miR-195-5p | C3orf27   | -0.47 |
| has-miR-195 | has-miR-195-5p | ENTPD7    | -0.46 |
| has-miR-195 | has-miR-195-5p | GABARAPL1 | -0.46 |
| has-miR-195 | has-miR-195-5p | PAFAH1B1  | -0.46 |
| has-miR-195 | has-miR-195-5p | TFAP2D    | -0.46 |
| has-miR-195 | has-miR-195-5p | KIF21A    | -0.46 |
| has-miR-195 | has-miR-195-5p | RNF125    | -0.46 |
| has-miR-195 | has-miR-195-5p | TFRC      | -0.46 |
| has-miR-195 | has-miR-195-5p | INSR      | -0.46 |



|             |                |          |       |
|-------------|----------------|----------|-------|
| has-miR-195 | has-miR-195-5p | PCMT1    | -0.46 |
| has-miR-195 | has-miR-195-5p | TACC1    | -0.46 |
| has-miR-195 | has-miR-195-5p | WNT2B    | -0.46 |
| has-miR-195 | has-miR-195-5p | HELZ     | -0.45 |
| has-miR-195 | has-miR-195-5p | RECK     | -0.45 |
| has-miR-195 | has-miR-195-5p | RAB9A    | -0.45 |
| has-miR-195 | has-miR-195-5p | PLA2G15  | -0.45 |
| has-miR-195 | has-miR-195-5p | GABBR1   | -0.45 |
| has-miR-195 | has-miR-195-5p | TRMT112  | -0.45 |
| has-miR-195 | has-miR-195-5p | KIAA1328 | -0.45 |
| has-miR-195 | has-miR-195-5p | CIDEB    | -0.45 |
| has-miR-195 | has-miR-195-5p | E2F7     | -0.45 |
| has-miR-195 | has-miR-195-5p | DCP1A    | -0.45 |
| has-miR-195 | has-miR-195-5p | MMS19    | -0.45 |
| has-miR-195 | has-miR-195-5p | HIGD1A   | -0.45 |
| has-miR-195 | has-miR-195-5p | ALAD     | -0.45 |
| has-miR-195 | has-miR-195-5p | CPEB2    | -0.45 |
| has-miR-195 | has-miR-195-5p | SGK1     | -0.44 |
| has-miR-195 | has-miR-195-5p | VPS4A    | -0.44 |
| has-miR-195 | has-miR-195-5p | SLIT2    | -0.44 |
| has-miR-195 | has-miR-195-5p | PCDHA3   | -0.44 |
| has-miR-195 | has-miR-195-5p | GALNT7   | -0.44 |

|             |                |                |       |
|-------------|----------------|----------------|-------|
| has-miR-195 | has-miR-195-5p | SNX16          | -0.44 |
| has-miR-195 | has-miR-195-5p | CHAC1          | -0.44 |
| has-miR-195 | has-miR-195-5p | ZNF449         | -0.44 |
| has-miR-195 | has-miR-195-5p | MIPOL1         | -0.43 |
| has-miR-195 | has-miR-195-5p | PHACTR2        | -0.43 |
| has-miR-195 | has-miR-195-5p | GORASP2        | -0.43 |
| has-miR-195 | has-miR-195-5p | PLRG1          | -0.43 |
| has-miR-195 | has-miR-195-5p | AGO4           | -0.43 |
| has-miR-195 | has-miR-195-5p | TMEM189-UBE2V1 | -0.43 |
| has-miR-195 | has-miR-195-5p | STRADB         | -0.43 |
| has-miR-195 | has-miR-195-5p | CDK17          | -0.43 |
| has-miR-195 | has-miR-195-5p | BDNF           | -0.43 |
| has-miR-195 | has-miR-195-5p | RFX3           | -0.43 |
| has-miR-195 | has-miR-195-5p | TMEM189        | -0.43 |
| has-miR-195 | has-miR-195-5p | CARM1          | -0.43 |
| has-miR-195 | has-miR-195-5p | SCN8A          | -0.43 |
| has-miR-195 | has-miR-195-5p | PLD1           | -0.43 |
| has-miR-195 | has-miR-195-5p | CDC14A         | -0.43 |
| has-miR-195 | has-miR-195-5p | ATXN7L3        | -0.43 |
| has-miR-195 | has-miR-195-5p | KIF5A          | -0.43 |
| has-miR-195 | has-miR-195-5p | FGF18          | -0.43 |
| has-miR-195 | has-miR-195-5p | TENM2          | -0.43 |

|             |                |          |       |
|-------------|----------------|----------|-------|
| has-miR-195 | has-miR-195-5p | ZNF609   | -0.43 |
| has-miR-195 | has-miR-195-5p | LUZP1    | -0.43 |
| has-miR-195 | has-miR-195-5p | MYLK     | -0.42 |
| has-miR-195 | has-miR-195-5p | TMCC1    | -0.42 |
| has-miR-195 | has-miR-195-5p | CDC27    | -0.42 |
| has-miR-195 | has-miR-195-5p | KIAA1432 | -0.42 |
| has-miR-195 | has-miR-195-5p | ELL      | -0.42 |
| has-miR-195 | has-miR-195-5p | DOLPP1   | -0.42 |
| has-miR-195 | has-miR-195-5p | GSTCD    | -0.42 |
| has-miR-195 | has-miR-195-5p | RAB40AL  | -0.42 |
| has-miR-195 | has-miR-195-5p | ZMYM2    | -0.42 |
| has-miR-195 | has-miR-195-5p | IHH      | -0.42 |
| has-miR-195 | has-miR-195-5p | HMGA1    | -0.42 |
| has-miR-195 | has-miR-195-5p | GYLTL1B  | -0.42 |
| has-miR-195 | has-miR-195-5p | PDCD11   | -0.42 |
| has-miR-195 | has-miR-195-5p | CCNYL1   | -0.42 |
| has-miR-195 | has-miR-195-5p | CD28     | -0.42 |
| has-miR-195 | has-miR-195-5p | VWC2L    | -0.42 |
| has-miR-195 | has-miR-195-5p | LITAF    | -0.42 |
| has-miR-195 | has-miR-195-5p | USP3     | -0.42 |
| has-miR-195 | has-miR-195-5p | PPM1D    | -0.42 |
| has-miR-195 | has-miR-195-5p | CCND3    | -0.42 |

|             |                |         |       |
|-------------|----------------|---------|-------|
| has-miR-195 | has-miR-195-5p | MTMR11  | -0.42 |
| has-miR-195 | has-miR-195-5p | ACVR2B  | -0.42 |
| has-miR-195 | has-miR-195-5p | LMAN2L  | -0.42 |
| has-miR-195 | has-miR-195-5p | SCOC    | -0.42 |
| has-miR-195 | has-miR-195-5p | SLC2A3  | -0.41 |
| has-miR-195 | has-miR-195-5p | MAP2K1  | -0.41 |
| has-miR-195 | has-miR-195-5p | PSMD7   | -0.41 |
| has-miR-195 | has-miR-195-5p | DENND6A | -0.41 |
| has-miR-195 | has-miR-195-5p | AREL1   | -0.41 |
| has-miR-195 | has-miR-195-5p | RYBP    | -0.41 |
| has-miR-195 | has-miR-195-5p | SLC41A2 | -0.41 |
| has-miR-195 | has-miR-195-5p | ISLR    | -0.41 |
| has-miR-195 | has-miR-195-5p | CPEB3   | -0.41 |
| has-miR-195 | has-miR-195-5p | TPD52L3 | -0.41 |
| has-miR-195 | has-miR-195-5p | TRANK1  | -0.41 |
| has-miR-195 | has-miR-195-5p | G0S2    | -0.41 |
| has-miR-195 | has-miR-195-5p | SMURF2  | -0.41 |
| has-miR-195 | has-miR-195-5p | SCN2A   | -0.41 |
| has-miR-195 | has-miR-195-5p | FBXO21  | -0.41 |
| has-miR-195 | has-miR-195-5p | SYNJ1   | -0.41 |
| has-miR-195 | has-miR-195-5p | MAP7    | -0.41 |
| has-miR-195 | has-miR-195-5p | SYT4    | -0.41 |

|               |                |            |       |
|---------------|----------------|------------|-------|
| has-miR-195   | has-miR-195-5p | DYNLL2     | -0.4  |
| has-miR-195   | has-miR-195-5p | ATXN2      | -0.4  |
| has-miR-195   | has-miR-195-5p | SYDE2      | -0.4  |
| has-miR-195   | has-miR-195-5p | RFWD2      | -0.4  |
| has-miR-195   | has-miR-195-5p | ELL2       | -0.4  |
| has-miR-195   | has-miR-195-5p | FAM91A1    | -0.4  |
| has-miR-195   | has-miR-195-5p | DYNC111    | -0.4  |
| has-miR-195   | has-miR-195-5p | STK33      | -0.4  |
| has-miR-195   | has-miR-195-5p | SOCS6      | -0.4  |
| has-miR-195   | has-miR-195-5p | PDCD4      | -0.4  |
| has-miR-195   | has-miR-195-5p | PAM        | -0.4  |
| has-miR-195   | has-miR-195-5p | C2orf72    | -0.4  |
| has-miR-195   | has-miR-195-5p | MYT1L      | -0.4  |
| has-miR-195   | has-miR-195-5p | FRY        | -0.4  |
| has-miR-548ba | has-miR-548ba  | TMEM229A   | -0.81 |
| has-miR-548ba | has-miR-548ba  | PSMA8      | -0.77 |
| has-miR-548ba | has-miR-548ba  | GNG12      | -0.73 |
| has-miR-548ba | has-miR-548ba  | KPNA4      | -0.73 |
| has-miR-548ba | has-miR-548ba  | COX5A      | -0.71 |
| has-miR-548ba | has-miR-548ba  | CENPK      | -0.68 |
| has-miR-548ba | has-miR-548ba  | CMC1       | -0.67 |
| has-miR-548ba | has-miR-548ba  | PABPC5     | -0.67 |
| has-miR-548ba | has-miR-548ba  | BRMS1L     | -0.66 |
| has-miR-548ba | has-miR-548ba  | FAM198B    | -0.66 |
| has-miR-548ba | has-miR-548ba  | LAMTOR5    | -0.65 |
| has-miR-548ba | has-miR-548ba  | AC024257.1 | -0.62 |
| has-miR-548ba | has-miR-548ba  | MOB1B      | -0.62 |
| has-miR-548ba | has-miR-548ba  | KRTAP9-9   | -0.61 |
| has-miR-548ba | has-miR-548ba  | KIAA1432   | -0.6  |
| has-miR-548ba | has-miR-548ba  | DPP4       | -0.57 |

|               |               |           |       |
|---------------|---------------|-----------|-------|
| has-miR-548ba | has-miR-548ba | C18orf56  | -0.56 |
| has-miR-548ba | has-miR-548ba | P2RY10    | -0.56 |
| has-miR-548ba | has-miR-548ba | C5orf15   | -0.55 |
| has-miR-548ba | has-miR-548ba | OR5AU1    | -0.55 |
| has-miR-548ba | has-miR-548ba | NUDT4     | -0.55 |
| has-miR-548ba | has-miR-548ba | PTAR1     | -0.54 |
| has-miR-548ba | has-miR-548ba | FIP1L1    | -0.54 |
|               |               | DKFZP434E |       |
| has-miR-548ba | has-miR-548ba | 1119      | -0.53 |
| has-miR-548ba | has-miR-548ba | SSH1      | -0.53 |
| has-miR-548ba | has-miR-548ba | POLR3G    | -0.52 |
| has-miR-548ba | has-miR-548ba | C7orf57   | -0.52 |
| has-miR-548ba | has-miR-548ba | ITM2B     | -0.52 |
| has-miR-548ba | has-miR-548ba | SH3BGRL   | -0.51 |
| has-miR-548ba | has-miR-548ba | ACTL6A    | -0.51 |
| has-miR-548ba | has-miR-548ba | LOH12CR2  | -0.51 |
| has-miR-548ba | has-miR-548ba | ALG10B    | -0.51 |
| has-miR-548ba | has-miR-548ba | UGT3A1    | -0.51 |
| has-miR-548ba | has-miR-548ba | NELL2     | -0.5  |
| has-miR-548ba | has-miR-548ba | ACPI      | -0.5  |
| has-miR-548ba | has-miR-548ba | CCNI      | -0.49 |
| has-miR-548ba | has-miR-548ba | TMEM194A  | -0.49 |
| has-miR-548ba | has-miR-548ba | CDCA4     | -0.49 |
| has-miR-548ba | has-miR-548ba | VWC2      | -0.49 |
| has-miR-548ba | has-miR-548ba | SRGN      | -0.49 |
| has-miR-548ba | has-miR-548ba | FAM220A   | -0.49 |
| has-miR-548ba | has-miR-548ba | KRAS      | -0.49 |
| has-miR-548ba | has-miR-548ba | EIF1AY    | -0.48 |
| has-miR-548ba | has-miR-548ba | CAV2      | -0.48 |
| has-miR-548ba | has-miR-548ba | SCARA5    | -0.48 |
| has-miR-548ba | has-miR-548ba | ZNF677    | -0.48 |
| has-miR-548ba | has-miR-548ba | KRT12     | -0.47 |
| has-miR-548ba | has-miR-548ba | INS-IGF2  | -0.47 |
| has-miR-548ba | has-miR-548ba | EXOC5     | -0.47 |
| has-miR-548ba | has-miR-548ba | TMTC3     | -0.46 |
| has-miR-548ba | has-miR-548ba | CHCHD3    | -0.46 |
| has-miR-548ba | has-miR-548ba | MFAP3L    | -0.46 |
| has-miR-548ba | has-miR-548ba | TSPAN13   | -0.46 |
| has-miR-548ba | has-miR-548ba | MSR1      | -0.46 |
| has-miR-548ba | has-miR-548ba | SEP15     | -0.46 |
| has-miR-548ba | has-miR-548ba | ANKRD17   | -0.46 |
| has-miR-548ba | has-miR-548ba | UBE2E3    | -0.46 |
| has-miR-548ba | has-miR-548ba | FAM89A    | -0.45 |
| has-miR-548ba | has-miR-548ba | DCAKD     | -0.45 |

|               |               |             |       |
|---------------|---------------|-------------|-------|
| has-miR-548ba | has-miR-548ba | PCK1        | -0.45 |
| has-miR-548ba | has-miR-548ba | TMSB4Y      | -0.45 |
| has-miR-548ba | has-miR-548ba | IQCK        | -0.45 |
| has-miR-548ba | has-miR-548ba | C1S         | -0.45 |
| has-miR-548ba | has-miR-548ba | BCAT1       | -0.44 |
| has-miR-548ba | has-miR-548ba | SLC17A6     | -0.44 |
|               |               | RP11-       |       |
| has-miR-548ba | has-miR-548ba | 276H1.3     | -0.44 |
| has-miR-548ba | has-miR-548ba | RHOA        | -0.44 |
| has-miR-548ba | has-miR-548ba | GRPEL2      | -0.44 |
| has-miR-548ba | has-miR-548ba | C1orf115    | -0.43 |
| has-miR-548ba | has-miR-548ba | IFIT1B      | -0.43 |
| has-miR-548ba | has-miR-548ba | ZDHHC21     | -0.43 |
| has-miR-548ba | has-miR-548ba | DUSP21      | -0.43 |
| has-miR-548ba | has-miR-548ba | EFEMP1      | -0.43 |
| has-miR-548ba | has-miR-548ba | GPR50       | -0.43 |
| has-miR-548ba | has-miR-548ba | NAT1        | -0.42 |
| has-miR-548ba | has-miR-548ba | MBNL3       | -0.42 |
| has-miR-548ba | has-miR-548ba | C9orf169    | -0.42 |
| has-miR-548ba | has-miR-548ba | CDO1        | -0.42 |
| has-miR-548ba | has-miR-548ba | BAG2        | -0.42 |
| has-miR-548ba | has-miR-548ba | SPDYE1      | -0.42 |
| has-miR-548ba | has-miR-548ba | LMBR1       | -0.41 |
| has-miR-548ba | has-miR-548ba | TMPRSS11B   | -0.41 |
| has-miR-548ba | has-miR-548ba | RTKN2       | -0.41 |
| has-miR-548ba | has-miR-548ba | ULK2        | -0.41 |
| has-miR-548ba | has-miR-548ba | TP63        | -0.4  |
| has-miR-548ba | has-miR-548ba | PRRG1       | -0.4  |
| has-miR-548ba | has-miR-548ba | CHST14      | -0.4  |
| has-miR-548ba | has-miR-548ba | PPP3R1      | -0.4  |
| has-miR-548ba | has-miR-548ba | C7orf69     | -0.4  |
| has-miR-3199  | has-miR-3199  | C17orf74    | -1.11 |
| has-miR-3199  | has-miR-3199  | CRAMP1L     | -0.91 |
| has-miR-3199  | has-miR-3199  | OR10A2      | -0.84 |
| has-miR-3199  | has-miR-3199  | M6PR        | -0.81 |
| has-miR-3199  | has-miR-3199  | XRCC3       | -0.79 |
| has-miR-3199  | has-miR-3199  | KB-1980E6.3 | -0.78 |
| has-miR-3199  | has-miR-3199  | RGR         | -0.77 |
| has-miR-3199  | has-miR-3199  | NAAA        | -0.76 |
| has-miR-3199  | has-miR-3199  | INTS9       | -0.76 |
| has-miR-3199  | has-miR-3199  | KIAA0040    | -0.75 |
| has-miR-3199  | has-miR-3199  | EPHX3       | -0.74 |
| has-miR-3199  | has-miR-3199  | RAB26       | -0.74 |
| has-miR-3199  | has-miR-3199  | HMGA2       | -0.74 |

|              |              |           |       |
|--------------|--------------|-----------|-------|
| has-miR-3199 | has-miR-3199 | HES7      | -0.73 |
| has-miR-3199 | has-miR-3199 | SULT1C2   | -0.73 |
| has-miR-3199 | has-miR-3199 | CST3      | -0.72 |
| has-miR-3199 | has-miR-3199 | SLC25A20  | -0.71 |
| has-miR-3199 | has-miR-3199 | SYNGR3    | -0.7  |
|              |              | CTD-      |       |
| has-miR-3199 | has-miR-3199 | 2330K9.3  | -0.7  |
| has-miR-3199 | has-miR-3199 | ARHGEF7   | -0.69 |
| has-miR-3199 | has-miR-3199 | KRT72     | -0.69 |
| has-miR-3199 | has-miR-3199 | SIRPB2    | -0.69 |
| has-miR-3199 | has-miR-3199 | BPIFB4    | -0.68 |
| has-miR-3199 | has-miR-3199 | CBL       | -0.68 |
| has-miR-3199 | has-miR-3199 | TPM3      | -0.68 |
| has-miR-3199 | has-miR-3199 | PRDM6     | -0.68 |
| has-miR-3199 | has-miR-3199 | GNPDA2    | -0.68 |
| has-miR-3199 | has-miR-3199 | APOL1     | -0.67 |
| has-miR-3199 | has-miR-3199 | REEP6     | -0.65 |
| has-miR-3199 | has-miR-3199 | ACAD10    | -0.65 |
| has-miR-3199 | has-miR-3199 | EIF2B1    | -0.64 |
| has-miR-3199 | has-miR-3199 | EIF4E     | -0.64 |
| has-miR-3199 | has-miR-3199 | ARCN1     | -0.64 |
| has-miR-3199 | has-miR-3199 | LGALS9    | -0.63 |
| has-miR-3199 | has-miR-3199 | LSM2      | -0.63 |
| has-miR-3199 | has-miR-3199 | CCDC102A  | -0.63 |
| has-miR-3199 | has-miR-3199 | IDNK      | -0.62 |
| has-miR-3199 | has-miR-3199 | HSD17B3   | -0.62 |
| has-miR-3199 | has-miR-3199 | VASN      | -0.62 |
| has-miR-3199 | has-miR-3199 | CD28      | -0.62 |
| has-miR-3199 | has-miR-3199 | CPLX2     | -0.62 |
| has-miR-3199 | has-miR-3199 | CNTFR     | -0.61 |
| has-miR-3199 | has-miR-3199 | MVK       | -0.61 |
| has-miR-3199 | has-miR-3199 | GRB2      | -0.61 |
| has-miR-3199 | has-miR-3199 | PPP4R4    | -0.61 |
| has-miR-3199 | has-miR-3199 | C4orf36   | -0.61 |
| has-miR-3199 | has-miR-3199 | KRT80     | -0.61 |
| has-miR-3199 | has-miR-3199 | CLSTN1    | -0.61 |
| has-miR-3199 | has-miR-3199 | DNAJC5G   | -0.61 |
| has-miR-3199 | has-miR-3199 | KLK10     | -0.6  |
| has-miR-3199 | has-miR-3199 | NFATC2IP  | -0.6  |
| has-miR-3199 | has-miR-3199 | C15orf56  | -0.6  |
| has-miR-3199 | has-miR-3199 | TTC40     | -0.59 |
| has-miR-3199 | has-miR-3199 | HSD11B1L  | -0.59 |
| has-miR-3199 | has-miR-3199 | KRTAP17-1 | -0.59 |



|              |              | AC007040.1 |       |
|--------------|--------------|------------|-------|
| has-miR-3199 | has-miR-3199 | 1          | -0.59 |
| has-miR-3199 | has-miR-3199 | EGR1       | -0.58 |
| has-miR-3199 | has-miR-3199 | CD27       | -0.58 |
| has-miR-3199 | has-miR-3199 | RPS5       | -0.58 |
| has-miR-3199 | has-miR-3199 | CRIP3      | -0.58 |
| has-miR-3199 | has-miR-3199 | GAB2       | -0.58 |
| has-miR-3199 | has-miR-3199 | SATB2      | -0.58 |
| has-miR-3199 | has-miR-3199 | IGLL5      | -0.57 |
| has-miR-3199 | has-miR-3199 | RBM14      | -0.57 |
| has-miR-3199 | has-miR-3199 | LIN52      | -0.57 |
| has-miR-3199 | has-miR-3199 | ERBB3      | -0.56 |
| has-miR-3199 | has-miR-3199 | C22orf26   | -0.56 |
| has-miR-3199 | has-miR-3199 | TNS1       | -0.56 |
| has-miR-3199 | has-miR-3199 | RNF187     | -0.56 |
| has-miR-3199 | has-miR-3199 | SLC39A4    | -0.56 |
| has-miR-3199 | has-miR-3199 | CD300LD    | -0.56 |
| has-miR-3199 | has-miR-3199 | LETMD1     | -0.56 |
| has-miR-3199 | has-miR-3199 | SLC22A25   | -0.56 |
| has-miR-3199 | has-miR-3199 | SYT2       | -0.56 |
| has-miR-3199 | has-miR-3199 | TANC2      | -0.55 |
| has-miR-3199 | has-miR-3199 | FAM228A    | -0.55 |
| has-miR-3199 | has-miR-3199 | MCC        | -0.55 |
| has-miR-3199 | has-miR-3199 | BCL11A     | -0.55 |
| has-miR-3199 | has-miR-3199 | IL20       | -0.55 |
| has-miR-3199 | has-miR-3199 | DBNDD1     | -0.55 |
| has-miR-3199 | has-miR-3199 | OMP        | -0.55 |
| has-miR-3199 | has-miR-3199 | AC132186.1 | -0.55 |
| has-miR-3199 | has-miR-3199 | INIP       | -0.55 |
| has-miR-3199 | has-miR-3199 | AC023590.1 | -0.55 |
| has-miR-3199 | has-miR-3199 | BCL2       | -0.55 |
| has-miR-3199 | has-miR-3199 | RCN3       | -0.54 |
| has-miR-3199 | has-miR-3199 | KIAA1143   | -0.54 |
| has-miR-3199 | has-miR-3199 | ODF2       | -0.54 |
| has-miR-3199 | has-miR-3199 | BEAN1      | -0.53 |
| has-miR-3199 | has-miR-3199 | IYD        | -0.53 |
| has-miR-3199 | has-miR-3199 | IQCK       | -0.53 |
| has-miR-3199 | has-miR-3199 | FHL2       | -0.53 |
| has-miR-3199 | has-miR-3199 | ABTB1      | -0.53 |
| has-miR-3199 | has-miR-3199 | PRTFDC1    | -0.53 |
| has-miR-3199 | has-miR-3199 | SMAD9      | -0.53 |
| has-miR-3199 | has-miR-3199 | CD48       | -0.53 |
| has-miR-3199 | has-miR-3199 | VASH1      | -0.53 |
| has-miR-3199 | has-miR-3199 | AP4M1      | -0.52 |

|              |              |          |       |
|--------------|--------------|----------|-------|
| has-miR-3199 | has-miR-3199 | CDK3     | -0.52 |
| has-miR-3199 | has-miR-3199 | GPSM3    | -0.52 |
| has-miR-3199 | has-miR-3199 | EBF2     | -0.52 |
| has-miR-3199 | has-miR-3199 | AP3M2    | -0.51 |
| has-miR-3199 | has-miR-3199 | TGIF2LX  | -0.51 |
| has-miR-3199 | has-miR-3199 | PRAF2    | -0.51 |
| has-miR-3199 | has-miR-3199 | ZNF251   | -0.51 |
| has-miR-3199 | has-miR-3199 | SNTG1    | -0.51 |
| has-miR-3199 | has-miR-3199 | IL2RA    | -0.51 |
| has-miR-3199 | has-miR-3199 | MYL9     | -0.51 |
| has-miR-3199 | has-miR-3199 | SYT14    | -0.51 |
| has-miR-3199 | has-miR-3199 | ZNF791   | -0.51 |
| has-miR-3199 | has-miR-3199 | ZMYM1    | -0.51 |
| has-miR-3199 | has-miR-3199 | CD84     | -0.51 |
| has-miR-3199 | has-miR-3199 | GP1BA    | -0.51 |
| has-miR-3199 | has-miR-3199 | NCR3     | -0.51 |
| has-miR-3199 | has-miR-3199 | SPSB4    | -0.51 |
| has-miR-3199 | has-miR-3199 | CNR2     | -0.51 |
| has-miR-3199 | has-miR-3199 | PER2     | -0.51 |
| has-miR-3199 | has-miR-3199 | TRPC4AP  | -0.5  |
| has-miR-3199 | has-miR-3199 | KRT6B    | -0.5  |
| has-miR-3199 | has-miR-3199 | LRRC58   | -0.5  |
| has-miR-3199 | has-miR-3199 | RAB3B    | -0.5  |
| has-miR-3199 | has-miR-3199 | RPL22    | -0.5  |
| has-miR-3199 | has-miR-3199 | FAM153C  | -0.5  |
| has-miR-3199 | has-miR-3199 | SPRED3   | -0.5  |
| has-miR-3199 | has-miR-3199 | SMAGP    | -0.5  |
| has-miR-3199 | has-miR-3199 | BOD1     | -0.5  |
| has-miR-3199 | has-miR-3199 | TRIM44   | -0.5  |
| has-miR-3199 | has-miR-3199 | GATC     | -0.5  |
| has-miR-3199 | has-miR-3199 | MTMR11   | -0.5  |
| has-miR-3199 | has-miR-3199 | GEMIN8   | -0.49 |
| has-miR-3199 | has-miR-3199 | SPRYD4   | -0.49 |
| has-miR-3199 | has-miR-3199 | ZNF541   | -0.49 |
| has-miR-3199 | has-miR-3199 | C22orf24 | -0.49 |
| has-miR-3199 | has-miR-3199 | TBC1D3C  | -0.49 |
| has-miR-3199 | has-miR-3199 | CYTH4    | -0.49 |
| has-miR-3199 | has-miR-3199 | GPX6     | -0.49 |
| has-miR-3199 | has-miR-3199 | PROK1    | -0.49 |
| has-miR-3199 | has-miR-3199 | FOXE1    | -0.49 |
| has-miR-3199 | has-miR-3199 | LRP8     | -0.49 |
| has-miR-3199 | has-miR-3199 | NKAIN4   | -0.48 |
| has-miR-3199 | has-miR-3199 | SLC38A7  | -0.48 |
| has-miR-3199 | has-miR-3199 | SLC15A3  | -0.48 |

|              |              |                  |       |
|--------------|--------------|------------------|-------|
| has-miR-3199 | has-miR-3199 | C1orf95<br>CTD-  | -0.48 |
| has-miR-3199 | has-miR-3199 | 2616J11.4        | -0.48 |
| has-miR-3199 | has-miR-3199 | TMEM59L          | -0.47 |
| has-miR-3199 | has-miR-3199 | TMEM200A         | -0.47 |
| has-miR-3199 | has-miR-3199 | AL021546.6       | -0.47 |
| has-miR-3199 | has-miR-3199 | RAB42            | -0.47 |
| has-miR-3199 | has-miR-3199 | ATP2C1           | -0.47 |
| has-miR-3199 | has-miR-3199 | WDR45            | -0.47 |
| has-miR-3199 | has-miR-3199 | AF196779.12      | -0.47 |
| has-miR-3199 | has-miR-3199 | FGFBP1           | -0.47 |
| has-miR-3199 | has-miR-3199 | COX19            | -0.47 |
| has-miR-3199 | has-miR-3199 | MAFF             | -0.46 |
| has-miR-3199 | has-miR-3199 | KDM6B            | -0.46 |
| has-miR-3199 | has-miR-3199 | AIFM3            | -0.46 |
| has-miR-3199 | has-miR-3199 | MFAP2            | -0.46 |
| has-miR-3199 | has-miR-3199 | GBA              | -0.46 |
| has-miR-3199 | has-miR-3199 | FAM86C1          | -0.46 |
| has-miR-3199 | has-miR-3199 | HUNK             | -0.46 |
| has-miR-3199 | has-miR-3199 | FYB              | -0.46 |
| has-miR-3199 | has-miR-3199 | AC016559.1       | -0.46 |
| has-miR-3199 | has-miR-3199 | LDOC1            | -0.45 |
| has-miR-3199 | has-miR-3199 | KRT17            | -0.45 |
| has-miR-3199 | has-miR-3199 | STOML1           | -0.45 |
| has-miR-3199 | has-miR-3199 | AGTRAP           | -0.45 |
| has-miR-3199 | has-miR-3199 | SLC35C1<br>RP11- | -0.45 |
| has-miR-3199 | has-miR-3199 | 204N11.1         | -0.45 |
| has-miR-3199 | has-miR-3199 | LIME1            | -0.45 |
| has-miR-3199 | has-miR-3199 | PIP5K1C          | -0.45 |
| has-miR-3199 | has-miR-3199 | PRX              | -0.45 |
| has-miR-3199 | has-miR-3199 | MTPAP            | -0.44 |
| has-miR-3199 | has-miR-3199 | SNX24            | -0.44 |
| has-miR-3199 | has-miR-3199 | AQPEP            | -0.44 |
| has-miR-3199 | has-miR-3199 | CEND1            | -0.44 |
| has-miR-3199 | has-miR-3199 | CEACAM19         | -0.44 |
| has-miR-3199 | has-miR-3199 | JUP              | -0.44 |
| has-miR-3199 | has-miR-3199 | PPP1R9A          | -0.44 |
| has-miR-3199 | has-miR-3199 | AC079210.1       | -0.43 |
| has-miR-3199 | has-miR-3199 | TRIM50           | -0.43 |
| has-miR-3199 | has-miR-3199 | GYPA             | -0.43 |
| has-miR-3199 | has-miR-3199 | PIANP            | -0.43 |
| has-miR-3199 | has-miR-3199 | SLC6A17          | -0.43 |
| has-miR-3199 | has-miR-3199 | TAC1             | -0.43 |

|              |              |          |       |
|--------------|--------------|----------|-------|
| has-miR-3199 | has-miR-3199 | FKBP6    | -0.43 |
| has-miR-3199 | has-miR-3199 | RCAN2    | -0.43 |
| has-miR-3199 | has-miR-3199 | CD4      | -0.43 |
| has-miR-3199 | has-miR-3199 | CMPK2    | -0.42 |
| has-miR-3199 | has-miR-3199 | C5orf22  | -0.42 |
| has-miR-3199 | has-miR-3199 | FAM182B  | -0.42 |
| has-miR-3199 | has-miR-3199 | SMAD7    | -0.42 |
| has-miR-3199 | has-miR-3199 | SH3BGRL3 | -0.42 |
| has-miR-3199 | has-miR-3199 | DPF3     | -0.42 |
| has-miR-3199 | has-miR-3199 | EPN2     | -0.42 |
| has-miR-3199 | has-miR-3199 | TNPO1    | -0.42 |
| has-miR-3199 | has-miR-3199 | C19orf26 | -0.42 |
| has-miR-3199 | has-miR-3199 | ADORA2A  | -0.42 |
| has-miR-3199 | has-miR-3199 | DOK1     | -0.42 |
| has-miR-3199 | has-miR-3199 | VANGL1   | -0.42 |
| has-miR-3199 | has-miR-3199 | CD19     | -0.42 |
| has-miR-3199 | has-miR-3199 | RAC2     | -0.42 |
| has-miR-3199 | has-miR-3199 | ZBTB16   | -0.42 |
| has-miR-3199 | has-miR-3199 | THAP4    | -0.42 |
| has-miR-3199 | has-miR-3199 | IQSEC2   | -0.42 |
| has-miR-3199 | has-miR-3199 | ADAM33   | -0.41 |
| has-miR-3199 | has-miR-3199 | ZNRD1    | -0.41 |
| has-miR-3199 | has-miR-3199 | ECE1     | -0.41 |
| has-miR-3199 | has-miR-3199 | PTTG1IP  | -0.41 |
| has-miR-3199 | has-miR-3199 | FAF2     | -0.41 |
| has-miR-3199 | has-miR-3199 | ZNF773   | -0.41 |
| has-miR-3199 | has-miR-3199 | TP53INP2 | -0.41 |
| has-miR-3199 | has-miR-3199 | GJA3     | -0.41 |
| has-miR-3199 | has-miR-3199 | GNG13    | -0.41 |
| has-miR-3199 | has-miR-3199 | TRAM2    | -0.41 |
| has-miR-3199 | has-miR-3199 | CTBP2    | -0.41 |
| has-miR-3199 | has-miR-3199 | C2orf71  | -0.41 |
| has-miR-3199 | has-miR-3199 | GPX2     | -0.41 |
| has-miR-3199 | has-miR-3199 | LPO      | -0.41 |
| has-miR-3199 | has-miR-3199 | SLC35F2  | -0.41 |
| has-miR-3199 | has-miR-3199 | VPS37B   | -0.41 |
| has-miR-3199 | has-miR-3199 | SYNPO2L  | -0.41 |
| has-miR-3199 | has-miR-3199 | TXNDC5   | -0.4  |
| has-miR-3199 | has-miR-3199 | SNAPIN   | -0.4  |
| has-miR-3199 | has-miR-3199 | LY6E     | -0.4  |
| has-miR-3199 | has-miR-3199 | LY86     | -0.4  |
| has-miR-3199 | has-miR-3199 | DUOX2    | -0.4  |
| has-miR-3199 | has-miR-3199 | ACTN4    | -0.4  |
| has-miR-3199 | has-miR-3199 | MCFD2    | -0.4  |

|              |               |           |       |
|--------------|---------------|-----------|-------|
| has-miR-3199 | has-miR-3199  | TGIF2LY   | -0.4  |
| has-miR-3199 | has-miR-3199  | CSRP2BP   | -0.4  |
| has-miR-3199 | has-miR-3199  | ARID5B    | -0.4  |
| has-miR-3199 | has-miR-3199  | ARRDC4    | -0.4  |
| has-miR-3199 | has-miR-3199  | C16orf45  | -0.4  |
| has-miR-3199 | has-miR-3199  | MXI1      | -0.4  |
|              | has-miR-6507- |           |       |
| has-miR-6507 | 3p            | SEPT11    | -1    |
|              | has-miR-6507- |           |       |
| has-miR-6507 | 3p            | ZNF589    | -0.86 |
|              | has-miR-6507- |           |       |
| has-miR-6507 | 3p            | C3orf55   | -0.72 |
|              | has-miR-6507- |           |       |
| has-miR-6507 | 3p            | LRRC57    | -0.72 |
|              | has-miR-6507- |           |       |
| has-miR-6507 | 3p            | PPP4R4    | -0.7  |
|              | has-miR-6507- |           |       |
| has-miR-6507 | 3p            | FGG       | -0.67 |
|              | has-miR-6507- |           |       |
| has-miR-6507 | 3p            | C10orf131 | -0.64 |
|              | has-miR-6507- |           |       |
| has-miR-6507 | 3p            | COX5A     | -0.62 |
|              | has-miR-6507- |           |       |
| has-miR-6507 | 3p            | LPAR1     | -0.61 |
|              | has-miR-6507- |           |       |
| has-miR-6507 | 3p            | C2orf47   | -0.61 |
|              | has-miR-6507- |           |       |
| has-miR-6507 | 3p            | MTFMT     | -0.61 |
|              | has-miR-6507- |           |       |
| has-miR-6507 | 3p            | SLC35F5   | -0.61 |
|              | has-miR-6507- |           |       |
| has-miR-6507 | 3p            | CDK5      | -0.59 |
|              | has-miR-6507- |           |       |
| has-miR-6507 | 3p            | HAUS1     | -0.57 |
|              | has-miR-6507- |           |       |
| has-miR-6507 | 3p            | MBIP      | -0.57 |
|              | has-miR-6507- |           |       |
| has-miR-6507 | 3p            | F3        | -0.57 |
|              | has-miR-6507- |           |       |
| has-miR-6507 | 3p            | C10orf115 | -0.56 |
|              | has-miR-6507- |           |       |
| has-miR-6507 | 3p            | RP11-     |       |
|              | has-miR-6507- |           |       |
| has-miR-6507 | 3p            | 676J12.7  | -0.55 |
|              | has-miR-6507- |           |       |
| has-miR-6507 | 3p            | EID1      | -0.54 |

|              |                 |              |       |
|--------------|-----------------|--------------|-------|
| has-miR-6507 | has-miR-6507-3p | C1orf123     | -0.54 |
| has-miR-6507 | has-miR-6507-3p | CRADD        | -0.53 |
| has-miR-6507 | has-miR-6507-3p | MYRFL        | -0.53 |
| has-miR-6507 | has-miR-6507-3p | SPIN3        | -0.52 |
| has-miR-6507 | has-miR-6507-3p | RSPH10B      | -0.52 |
| has-miR-6507 | has-miR-6507-3p | AQP11        | -0.51 |
| has-miR-6507 | has-miR-6507-3p | BMP4         | -0.51 |
| has-miR-6507 | has-miR-6507-3p | NAA50        | -0.51 |
| has-miR-6507 | has-miR-6507-3p | FAR1         | -0.5  |
| has-miR-6507 | has-miR-6507-3p | FBXW11       | -0.5  |
| has-miR-6507 | has-miR-6507-3p | PGM3         | -0.49 |
| has-miR-6507 | has-miR-6507-3p | AC011294.3   | -0.49 |
| has-miR-6507 | has-miR-6507-3p | RP1-127H14.3 | -0.49 |
| has-miR-6507 | has-miR-6507-3p | EXOSC3       | -0.49 |
| has-miR-6507 | has-miR-6507-3p | NSFL1C       | -0.49 |
| has-miR-6507 | has-miR-6507-3p | PUS10        | -0.49 |
| has-miR-6507 | has-miR-6507-3p | MEIS2        | -0.48 |
| has-miR-6507 | has-miR-6507-3p | WRB          | -0.48 |
| has-miR-6507 | has-miR-6507-3p | RPL24        | -0.48 |
| has-miR-6507 | has-miR-6507-3p | C11orf52     | -0.47 |
| has-miR-6507 | has-miR-6507-3p | AC008132.1   | -0.47 |
| has-miR-6507 | has-miR-6507-3p | LPPR1        | -0.46 |

|              |                 |         |       |
|--------------|-----------------|---------|-------|
| has-miR-6507 | has-miR-6507-3p | DNAJB11 | -0.45 |
| has-miR-6507 | has-miR-6507-3p | MRPS25  | -0.45 |
| has-miR-6507 | has-miR-6507-3p | SPATS2  | -0.45 |
| has-miR-6507 | has-miR-6507-3p | KLHDC9  | -0.45 |
| has-miR-6507 | has-miR-6507-3p | IER5L   | -0.44 |
| has-miR-6507 | has-miR-6507-3p | C5orf47 | -0.44 |
| has-miR-6507 | has-miR-6507-3p | EBF3    | -0.44 |
| has-miR-6507 | has-miR-6507-3p | G3BP1   | -0.43 |
| has-miR-6507 | has-miR-6507-3p | RPS21   | -0.42 |
| has-miR-6507 | has-miR-6507-3p | MCHR2   | -0.42 |
| has-miR-6507 | has-miR-6507-3p | PTP4A2  | -0.42 |
| has-miR-6507 | has-miR-6507-3p | SC5D    | -0.42 |
| has-miR-6507 | has-miR-6507-3p | SRD5A1  | -0.41 |
| has-miR-6507 | has-miR-6507-3p | ELOVL7  | -0.41 |
| has-miR-6507 | has-miR-6507-3p | CYP24A1 | -0.41 |
| has-miR-6507 | has-miR-6507-3p | LIN9    | -0.41 |
| has-miR-6507 | has-miR-6507-3p | TREML1  | -0.41 |
| has-miR-6507 | has-miR-6507-3p | SHPRH   | -0.41 |
| has-miR-6507 | has-miR-6507-3p | VASH2   | -0.4  |
| has-miR-6507 | has-miR-6507-3p | TAF7    | -0.4  |
| has-miR-6507 | has-miR-6507-3p | HS6ST2  | -0.4  |
| has-miR-6507 | has-miR-6507-3p | MATN2   | -0.4  |

|              |                 |          |       |
|--------------|-----------------|----------|-------|
| has-miR-6507 | has-miR-6507-3p | PPP1R14B | -0.4  |
| has-miR-6507 | has-miR-6507-3p | WIPI2    | -0.4  |
| has-miR-6507 | has-miR-6507-3p | ENAH     | -0.4  |
| has-miR-133b | has-miR-133b    | LHFP     | -1.04 |
| has-miR-133b | has-miR-133b    | SEC61B   | -0.98 |
| has-miR-133b | has-miR-133b    | TAGLN2   | -0.92 |
| has-miR-133b | has-miR-133b    | CETN3    | -0.87 |
| has-miR-133b | has-miR-133b    | FTL      | -0.86 |
| has-miR-133b | has-miR-133b    | LDLRAP1  | -0.83 |
| has-miR-133b | has-miR-133b    | PTBP1    | -0.83 |
| has-miR-133b | has-miR-133b    | CLTA     | -0.78 |
| has-miR-133b | has-miR-133b    | TFAP2D   | -0.76 |
| has-miR-133b | has-miR-133b    | CELF4    | -0.76 |
| has-miR-133b | has-miR-133b    | SLC50A1  | -0.75 |
| has-miR-133b | has-miR-133b    | SYT2     | -0.75 |
| has-miR-133b | has-miR-133b    | TMEM200B | -0.75 |
| has-miR-133b | has-miR-133b    | TIMM17A  | -0.74 |
| has-miR-133b | has-miR-133b    | BICC1    | -0.72 |
| has-miR-133b | has-miR-133b    | RBMX     | -0.72 |
| has-miR-133b | has-miR-133b    | VKORC1   | -0.7  |
| has-miR-133b | has-miR-133b    | ZNF354A  | -0.7  |
| has-miR-133b | has-miR-133b    | SAMD5    | -0.7  |
| has-miR-133b | has-miR-133b    | PRRT2    | -0.67 |
| has-miR-133b | has-miR-133b    | LASP1    | -0.65 |
| has-miR-133b | has-miR-133b    | ZIC3     | -0.65 |
| has-miR-133b | has-miR-133b    | PPP2CA   | -0.65 |
| has-miR-133b | has-miR-133b    | PAX7     | -0.63 |
| has-miR-133b | has-miR-133b    | C12orf43 | -0.63 |
| has-miR-133b | has-miR-133b    | PPP2CB   | -0.63 |
| has-miR-133b | has-miR-133b    | SLC30A7  | -0.62 |
| has-miR-133b | has-miR-133b    | SGMS2    | -0.62 |
| has-miR-133b | has-miR-133b    | GDNF     | -0.62 |
| has-miR-133b | has-miR-133b    | SUMO1    | -0.61 |
| has-miR-133b | has-miR-133b    | FOSL2    | -0.6  |
| has-miR-133b | has-miR-133b    | SIMC1    | -0.6  |
| has-miR-133b | has-miR-133b    | SMARCD1  | -0.6  |
| has-miR-133b | has-miR-133b    | GPM6A    | -0.6  |
| has-miR-133b | has-miR-133b    | DOLPP1   | -0.6  |
| has-miR-133b | has-miR-133b    | PTPRZ1   | -0.6  |
| has-miR-133b | has-miR-133b    | TMEM167A | -0.6  |
| has-miR-133b | has-miR-133b    | CMPK1    | -0.6  |



|              |              |            |       |
|--------------|--------------|------------|-------|
| has-miR-133b | has-miR-133b | ARPP21     | -0.59 |
| has-miR-133b | has-miR-133b | PPP2R2D    | -0.59 |
| has-miR-133b | has-miR-133b | LHX9       | -0.59 |
| has-miR-133b | has-miR-133b | SLC6A1     | -0.58 |
| has-miR-133b | has-miR-133b | CNN2       | -0.58 |
| has-miR-133b | has-miR-133b | KIRREL     | -0.58 |
| has-miR-133b | has-miR-133b | XXYLT1     | -0.58 |
| has-miR-133b | has-miR-133b | LANCL2     | -0.58 |
| has-miR-133b | has-miR-133b | TPM4       | -0.57 |
| has-miR-133b | has-miR-133b | TMOD3      | -0.57 |
| has-miR-133b | has-miR-133b | VPS54      | -0.57 |
| has-miR-133b | has-miR-133b | COL25A1    | -0.57 |
| has-miR-133b | has-miR-133b | AGRP       | -0.56 |
| has-miR-133b | has-miR-133b | SGPP1      | -0.56 |
| has-miR-133b | has-miR-133b | FAM57A     | -0.55 |
| has-miR-133b | has-miR-133b | FOXL2      | -0.54 |
| has-miR-133b | has-miR-133b | CAPN15     | -0.54 |
| has-miR-133b | has-miR-133b | ZNF131     | -0.54 |
| has-miR-133b | has-miR-133b | UBA2       | -0.54 |
| has-miR-133b | has-miR-133b | KIF3C      | -0.54 |
| has-miR-133b | has-miR-133b | EMP2       | -0.54 |
| has-miR-133b | has-miR-133b | EIF4A1     | -0.54 |
| has-miR-133b | has-miR-133b | AFTPH      | -0.54 |
| has-miR-133b | has-miR-133b | NRIP3      | -0.53 |
| has-miR-133b | has-miR-133b | AL117190.3 | -0.53 |
|              |              | GABARAPL   |       |
| has-miR-133b | has-miR-133b | 1          | -0.53 |
| has-miR-133b | has-miR-133b | B3GALNT1   | -0.53 |
| has-miR-133b | has-miR-133b | GARNL3     | -0.52 |
| has-miR-133b | has-miR-133b | RAP2C      | -0.52 |
| has-miR-133b | has-miR-133b | TRIM44     | -0.52 |
| has-miR-133b | has-miR-133b | GABPB2     | -0.52 |
| has-miR-133b | has-miR-133b | ELFN1      | -0.51 |
| has-miR-133b | has-miR-133b | TXLNA      | -0.51 |
| has-miR-133b | has-miR-133b | STOM       | -0.51 |
| has-miR-133b | has-miR-133b | NAGS       | -0.51 |
| has-miR-133b | has-miR-133b | ANKRD28    | -0.51 |
| has-miR-133b | has-miR-133b | SLC6A6     | -0.5  |
| has-miR-133b | has-miR-133b | CRTAM      | -0.5  |
| has-miR-133b | has-miR-133b | ZC3H11A    | -0.5  |
| has-miR-133b | has-miR-133b | PLEKHA3    | -0.5  |
| has-miR-133b | has-miR-133b | SFXN2      | -0.5  |
| has-miR-133b | has-miR-133b | DCLRE1A    | -0.5  |
| has-miR-133b | has-miR-133b | PFAS       | -0.49 |

|              |              |          |       |
|--------------|--------------|----------|-------|
| has-miR-133b | has-miR-133b | KIAA1429 | -0.49 |
| has-miR-133b | has-miR-133b | QKI      | -0.49 |
| has-miR-133b | has-miR-133b | MAEA     | -0.48 |
| has-miR-133b | has-miR-133b | TBPL1    | -0.48 |
| has-miR-133b | has-miR-133b | SF3B4    | -0.48 |
| has-miR-133b | has-miR-133b | TMEM170B | -0.48 |
| has-miR-133b | has-miR-133b | SOX4     | -0.48 |
| has-miR-133b | has-miR-133b | TSPAN18  | -0.48 |
| has-miR-133b | has-miR-133b | GCH1     | -0.48 |
| has-miR-133b | has-miR-133b | RBMXL1   | -0.47 |
| has-miR-133b | has-miR-133b | DCBLD1   | -0.47 |
| has-miR-133b | has-miR-133b | SH3GL2   | -0.47 |
| has-miR-133b | has-miR-133b | ZNF280C  | -0.47 |
| has-miR-133b | has-miR-133b | SLC39A1  | -0.47 |
| has-miR-133b | has-miR-133b | METTL21B | -0.47 |
| has-miR-133b | has-miR-133b | FOXC1    | -0.46 |
| has-miR-133b | has-miR-133b | PTPRK    | -0.46 |
| has-miR-133b | has-miR-133b | WASF2    | -0.46 |
| has-miR-133b | has-miR-133b | RAVER1   | -0.46 |
| has-miR-133b | has-miR-133b | TRAM2    | -0.45 |
| has-miR-133b | has-miR-133b | VAMP2    | -0.45 |
| has-miR-133b | has-miR-133b | ZNF710   | -0.45 |
| has-miR-133b | has-miR-133b | SEPHS2   | -0.45 |
| has-miR-133b | has-miR-133b | EDEM1    | -0.45 |
| has-miR-133b | has-miR-133b | TTPAL    | -0.45 |
| has-miR-133b | has-miR-133b | SOBP     | -0.45 |
| has-miR-133b | has-miR-133b | BTBD3    | -0.44 |
| has-miR-133b | has-miR-133b | PDE8B    | -0.44 |
| has-miR-133b | has-miR-133b | FAM46A   | -0.44 |
| has-miR-133b | has-miR-133b | MAP3K2   | -0.44 |
| has-miR-133b | has-miR-133b | TM9SF3   | -0.44 |
| has-miR-133b | has-miR-133b | RARB     | -0.44 |
| has-miR-133b | has-miR-133b | SPRN     | -0.44 |
| has-miR-133b | has-miR-133b | FOXQ1    | -0.44 |
| has-miR-133b | has-miR-133b | ZC3H7A   | -0.44 |
| has-miR-133b | has-miR-133b | COL8A1   | -0.43 |
| has-miR-133b | has-miR-133b | JDP2     | -0.43 |
| has-miR-133b | has-miR-133b | POU6F2   | -0.43 |
| has-miR-133b | has-miR-133b | SNX15    | -0.43 |
| has-miR-133b | has-miR-133b | SNRK     | -0.43 |
|              |              | RAD51L3- |       |
| has-miR-133b | has-miR-133b | RFFL     | -0.43 |
| has-miR-133b | has-miR-133b | MAML1    | -0.43 |
| has-miR-133b | has-miR-133b | CELF6    | -0.43 |

|              |              |         |       |
|--------------|--------------|---------|-------|
| has-miR-133b | has-miR-133b | LHX5    | -0.43 |
| has-miR-133b | has-miR-133b | HS2ST1  | -0.42 |
| has-miR-133b | has-miR-133b | SGK1    | -0.42 |
| has-miR-133b | has-miR-133b | ATP6AP2 | -0.42 |
| has-miR-133b | has-miR-133b | ELF3    | -0.42 |
| has-miR-133b | has-miR-133b | NUP160  | -0.42 |
| has-miR-133b | has-miR-133b | ANKRD46 | -0.42 |
| has-miR-133b | has-miR-133b | CERS2   | -0.42 |
| has-miR-133b | has-miR-133b | ENPP5   | -0.42 |
| has-miR-133b | has-miR-133b | TUBB1   | -0.42 |
| has-miR-133b | has-miR-133b | CECR6   | -0.41 |
| has-miR-133b | has-miR-133b | GLRA2   | -0.41 |
| has-miR-133b | has-miR-133b | PDE1C   | -0.41 |
| has-miR-133b | has-miR-133b | SV2A    | -0.41 |
| has-miR-133b | has-miR-133b | DUSP1   | -0.41 |
| has-miR-133b | has-miR-133b | HAPLN1  | -0.41 |
| has-miR-133b | has-miR-133b | THRAP3  | -0.41 |
| has-miR-133b | has-miR-133b | VAT1    | -0.41 |
| has-miR-133b | has-miR-133b | NDRG1   | -0.41 |
| has-miR-133b | has-miR-133b | SYT1    | -0.41 |
| has-miR-133b | has-miR-133b | FGF1    | -0.4  |
| has-miR-133b | has-miR-133b | SP3     | -0.4  |
| has-miR-133b | has-miR-133b | CRK     | -0.4  |
| has-miR-133b | has-miR-133b | YPEL2   | -0.4  |
| has-miR-133b | has-miR-133b | ANKRD44 | -0.4  |
| has-miR-133b | has-miR-133b | MECOM   | -0.4  |
| has-miR-133b | has-miR-133b | MED12L  | -0.4  |
| has-miR-133b | has-miR-133b | RIMS1   | -0.4  |
| has-miR-133b | has-miR-133b | SCN2B   | -0.4  |
| has-miR-133b | has-miR-133b | ARFIP2  | -0.4  |

---

Table S3. Genes targeted by at least 4 hub miRNAs.

| Target genes | miRNAs                                                              |
|--------------|---------------------------------------------------------------------|
| SYT2         | has-miR-133a-1/has-miR-133a-2/has-miR-139/has-miR-3199/has-miR-133b |
| FOSL2        | has-miR-133a-1/has-miR-133a-2/has-miR-143/has-miR-133b/             |
| GABARAPL1    | has-miR-133a-1/has-miR-133a-2/has-miR-195/has-miR-133b              |
| GPM6A        | has-miR-133a-1/has-miR-133a-2/has-miR-28/has-miR-133b               |
| LASP1        | hsa-miR-1-1/hsa-miR-1-2/has-miR-133a-1/has-miR-133a-2/has-miR-133b  |
| TAGLN2       | hsa-miR-1-1/hsa-miR-1-2/has-miR-133a-1/has-miR-133a-2/has-miR-133b  |
| TPM4         | hsa-miR-1-1/hsa-miR-1-2/has-miR-133a-1/has-miR-133a-2/has-miR-133b  |
| VAPB         | has-miR-133a-1/has-miR-133a-2/has-miR-143/has-miR-195               |
